1 **The emergence of highly fit SARS-CoV-2 variants accelerated by recombination**

2 Michael R. Garvin<sup>1,2+\*</sup>, Erica T. Prates<sup>1,2+</sup>, Jonathon Romero<sup>3</sup>, Ashley Cliff<sup>3</sup>, Joao Gabriel Felipe  
3 Machado Gazolla<sup>1,2</sup>, Monica Pickholz<sup>4,5</sup>, Mirko Pavicic<sup>1,2</sup>, Daniel Jacobson<sup>1,2,\*</sup>

4 **Affiliations:**

5 <sup>1</sup>Oak Ridge National Laboratory, Computational Systems Biology, Biosciences, Oak Ridge, TN; <sup>2</sup>National Virtual  
6 Biotechnology Laboratory, US Department of Energy; <sup>3</sup>The Bredesen Center for Interdisciplinary Research and  
7 Graduate Education, University of Tennessee Knoxville, Knoxville, TN; <sup>4</sup>Departamento de Física, Facultad de  
8 Ciencias Exactas y Naturales, Universidad de Buenos Aires, Buenos Aires, Argentina; <sup>5</sup>Instituto de Física de Buenos  
9 Aires (IFIBA), CONICET-Universidad de Buenos Aires, Buenos Aires, Argentina.

10

11 **\*Correspondence:** [garvinmr@ornl.gov](mailto:garvinmr@ornl.gov), [jacobsonda@ornl.gov](mailto:jacobsonda@ornl.gov)

12 **+Contributed equally**

13

14 **Key words:** SARS-CoV-2; recombination; haplotype; Delta variant; variants of concern;  
15 COVID-19, syncytia

16

17 **Running title:** Highly fit SARS-CoV-2 generated from recombination

18

19

## 20 **Abstract**

21 The SARS-CoV-2 pandemic has entered an alarming new phase with the emergence of the variants  
22 of concern (VOC), P.1, B.1.351, and B.1.1.7, in late 2020, and B.1.427, B.1.429, and B.1.617, in  
23 2021. Substitutions in the spike glycoprotein (S), such as Asn<sup>501</sup>Tyr and Glu<sup>484</sup>Lys, are likely key  
24 in several VOC. However, Asn<sup>501</sup>Tyr had been circulating for months in earlier strains and  
25 Glu<sup>484</sup>Lys is not found in B.1.1.7, indicating that they do not fully explain those fast-spreading  
26 variants. Here we use a computational systems biology approach to process more than 900,000  
27 SARS-CoV-2 genomes and map spatiotemporal relationships, revealing other critical attributes of  
28 these variants. Comparisons to earlier dominant mutations and protein structural analyses indicate  
29 that the increased transmission is promoted by the combination of functionally complementary  
30 mutations in S and in other regions of the SARS-CoV-2 proteome. We report that the VOC have  
31 in common mutations in non-S proteins involved in immune-antagonism and replication  
32 performance, such as the nonstructural proteins 6 and 13, suggesting a convergent evolution of the  
33 virus. Critically, we propose that recombination events among divergent coinfecting haplotypes  
34 greatly accelerates the emergence of VOC by bringing together cooperative mutations and  
35 explaining the remarkably high mutation load of B.1.1.7. Therefore, extensive community  
36 distribution of SARS-CoV-2 increases the probability of future recombination events, further  
37 accelerating the evolution of the virus. This study reinforces the need for a global response to stop  
38 COVID-19 and future pandemics.

39 *Notice: This manuscript has been authored by UT-Battelle, LLC, under contract DE-AC05-00OR22725 with the US*  
40 *Department of Energy (DOE). The US government retains and the publisher, by accepting the article for publication,*  
41 *acknowledges that the US government retains a nonexclusive, paid-up, irrevocable, worldwide license to publish or*  
42 *reproduce the published form of this manuscript, or allow others to do so, for US government purposes. DOE will*  
43 *provide public access to these results of federally sponsored research in accordance with the DOE Public Access Plan*  
44 *(<http://energy.gov/downloads/doe-public-access-plan>).*

45

46 *"Nothing in Biology Makes Sense Except in the Light of Evolution" -Theodosius Dobzhansky*

47

48

## 49 1. Introduction

50 In late 2020, three SARS-CoV-2 variants of concern, VOC; B.1.1.7, B.1.351, and P.1 (also  
51 called Alpha, Beta, and Gamma respectively) rapidly became the predominant source of  
52 infections due to enhanced transmission rates and have since been linked to increased  
53 hospitalizations and mortalities (Alpert et al. 2021; Challen et al. 2021; Faria et al. 2021; Funk et  
54 al. 2021; Sabino et al. 2021; Washington et al. 2021; Davies et al.; Volz et al.). In early 2021,  
55 several new VOC appeared including, B.1.427 (Epsilon), B.1.526 (Iota), and B.1.617 (Delta).  
56 B.1.617 is of immediate concern because it is responsible for the COVID-19 crisis that recently  
57 began in India (Singh et al. 2021), is causing the majority of new infections in the United  
58 Kingdom (UK), and the United States (USA), and has now been observed in more than 70  
59 countries worldwide. Notably, several of these VOC have rapidly spread even in regions such as  
60 the UK that depend on robust sampling efforts for early detection. There is therefore a critical  
61 need to identify accurate predictors and biological causes for the increased transmission of the  
62 next VOC, which will inevitably emerge if the viral spread is not globally restrained.

63 Although extensive efforts are underway to achieve these ends, integrating new findings  
64 is critical to unravel the multiple biomolecular and environmental factors influencing viral  
65 evolution. Toward a holistic understanding of VOC emergence, two major weaknesses need to  
66 be addressed: (1) currently, the mutations used to identify VOC and potentially explain the  
67 altered biology of the virus are predominantly focused on the changes observed in the spike  
68 glycoprotein (S) whereas those in other genomic regions are largely ignored, and (2) the  
69 molecular models used to reconstruct the evolutionary history of the virus employ phylogenetic  
70 trees that are useful for species-level but not population-based analyses, which is the case with  
71 SARS-CoV-2 (Huson and Bryant 2006; Velasco 2013).

72 For example, the Asn<sup>501</sup>Tyr substitution in S is likely key because it increases affinity for  
73 the host receptor, angiotensin-converting enzyme 2 (ACE2) (Liu et al. 2021), and is often used to  
74 identify the late 2020 VOC (Fratev; Luan et al.), but this mutation has been circulating widely at  
75 low frequency and only expanded seven months after being first detected. Similarly, the  
76 Glu<sup>484</sup>Lys substitution in S is often discussed in the context of P.1 and B.1.351 VOC and may  
77 allow escape from neutralizing antibodies (Starr et al. 2021; Greaney et al.), but is not found in  
78 B.1.1.7 and therefore does not explain the increased transmission of all three late 2020 VOC.  
79 These characteristics suggest that several mutations including those in S are being transmitted as  
80 a linked set, i.e., a haplotype and their combined effects (i.e., epistasis) may be contributing to  
81 the rapid viral spread.

82 Widely used molecular evolutionary models based on phylogenetic trees are also  
83 problematic because the *algorithms* that are applied assume that mutations appearing in different  
84 SARS-CoV-2 haplotypes are due to repeated, independent mutations and the *scientific*  
85 *community* is interpreting this as evidence for the same; i.e., the logic is circular. Alternatively,  
86 these apparent repeated mutations may represent recombination, which is a common mechanism  
87 to accelerate evolution compared to single site mutations in positive strand RNA viruses such as  
88 SARS-CoV-2 (Bentley and Evans 2018). Furthermore, phylogenetic trees are unable to  
89 incorporate important molecular events and metadata such as geospatial and temporal data that  
90 would be highly informative for detecting current and future VOC.

91 In contrast, median-joining networks (MJN) are an efficient and accurate means to  
92 analyze haploid genomic data at the population level (Bandelt et al. 1999) such as SARS-CoV-2,  
93 (Garvin, Prates, et al. 2020). Unlike independently segregating sites represented in phylogenetic  
94 trees, the unit of interest in an MJN is the haplotype, which more accurately reflects the biology

95 of coronaviruses and enables the detection of important evolutionary events such as  
96 recombination. Furthermore, a network can be annotated with information including frequency,  
97 geospatial location, demographic, or clinical outcomes associated with a unique haplotype to  
98 create interpretable patterns of genome variation.

99 Here, we processed more than 900,000 SARS-CoV-2 genomes using a computational  
100 workflow that combines MJN and protein structural analysis (Garvin, Prates, et al. 2020; Prates  
101 et al. 2020) to identify critical attributes of these VOC and provide substantial evidence that the  
102 genome-wide mutation load of the late 2020 VOC results from recombination between divergent  
103 strains. Via focused structural analysis and molecular dynamics simulations, we explore the  
104 individual effects of key mutations in S and other proteins of SARS-CoV-2 that are shared  
105 among different VOC. We propose that linked mutations in VOC act cooperatively to enhance  
106 viral spread and our results emphasize the major role of community spread in generating future  
107 VOC (Sheikh et al. 2021).

108

## 109 **2. Results and Discussion**

### 110 *Molecular evolution of populations is best represented by a network*

111 The COVID-19 pandemic is both an unprecedented tragedy and an opportunity to study  
112 molecular evolution given the abundant and global sampling of the mutational space of SARS-  
113 CoV-2. The MJN is a valuable method of integrating these data to understand viral evolution  
114 because the model assumes single mutational steps in which each node represents a haplotype  
115 and the edge between nodes is a mutation leading to a new one. Typically, a subsample of extant

116 haplotypes for a taxon is obtained and unsampled, or extinct lineages are inferred. In contrast,  
117 SARS-CoV-2 sequence data repositories provide extensive sampling of haplotypes and  
118 collection dates (the calendar date of the sample). Given that in an MJN, the temporal  
119 distribution of haplotypes is inherent (the model assumes time-ordered sets of mutations), the  
120 mutational history of the virus can be traced as a genealogy that can incorporate both the relative  
121 *and* absolute times of emergence of SARS-CoV-2 variants. Importantly, when the single-  
122 mutational step MJN model fails, it produces features such as loops or clusters of inferred  
123 haplotypes that can indicate biologically important processes such as recombination events, back  
124 mutations, or repeat mutations at a site that may be under positive selection.

125         To make a direct comparison, we generated a network and a phylogenetic tree of SARS-  
126 CoV-2 haplotypes that were identified from sequences sampled during the first four months of  
127 the pandemic and deposited into GISAID (A Global Initiative on Sharing Avian Flu Data,  
128 [gisaid.org](https://gisaid.org)) (Figure 1). Clearly, important metadata such as haplotype frequency, date of  
129 emergence, and mutations of interest are easily displayed on the network but are not on the  
130 phylogenetic tree. Likewise, at day 96, reticulations (i.e., homoplasy loops) begin to appear in  
131 the MJN, indicating reverse mutations to the ancestral states at specific sites or possibly  
132 recombination events that can be explored further. Another important feature identified when  
133 using networks, but is lost when using phylogenetic trees, is the presence of polytomies. So-  
134 called soft polytomies often indicate unsampled genomic information at the species level and  
135 hard polytomies are molecular events often found in rapidly expanding populations. For  
136 example, haplotype H04 in the MJN (Figure 1) represents a hard polytomy and indicates that a  
137 frequent variant is further undergoing multiple independent mutational events, but the  
138 phylogenetic tree is unable to convey this information.

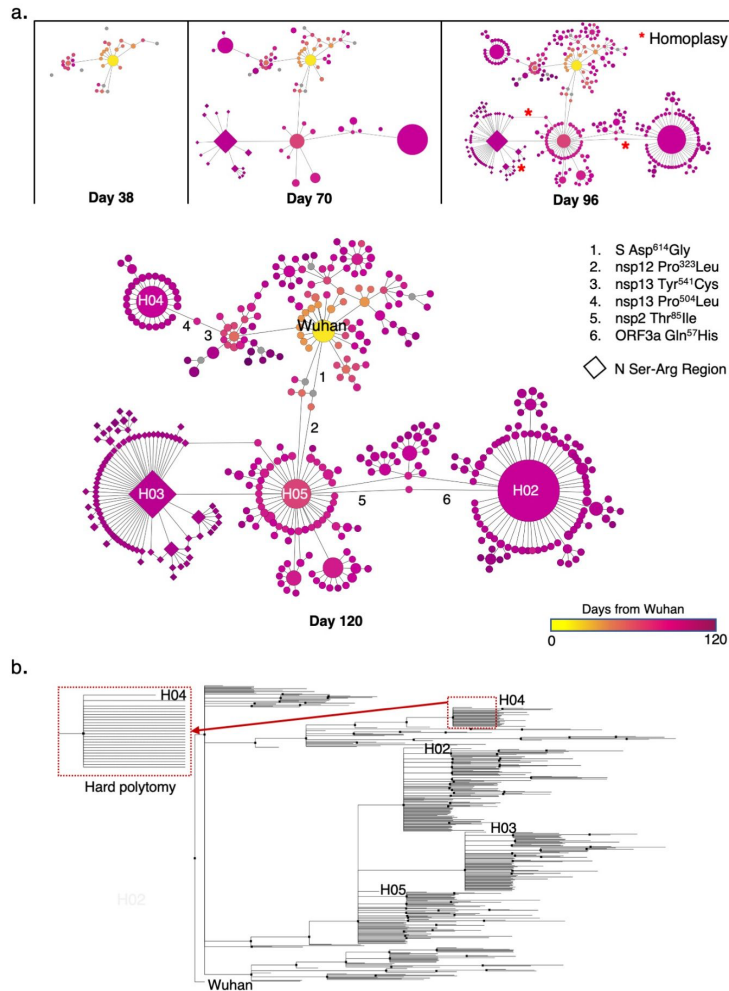

139

140 **Fig. 1. Comparison of a median-joining network (MJN) and phylogenetic tree generated with SARS-CoV-2**  
141 **sequences sampled through April 2020. a.** MJN of SARS-CoV-2 haplotypes, 96, and 120 days. Node sizes in the  
142 MJN correspond to sample sizes for a given haplotype and node colors indicate the time of its first report relative to  
143 the putative origin of the pandemic in Wuhan. The most abundant haplotypes are named H02 - H05 and numerals 1 -  
144 6 identify important mutations (Garvin, Prates, et al. 2020). Diamond shape nodes denote haplotypes that harbor a  
145 3-bp mutation in the nucleocapsid gene (N) that is highly conserved and directly affects viral replication *in vitro*  
146 (Tylor et al. 2009; Thorne et al. 2021). **b.** The phylogenetic tree is unable to convey the same information. For  
147 example, rapidly expanding populations often display polytomies, i.e., single mutations from a common central  
148 haplotype. Those events are readily identified on the MJN but difficult to interpret on a tree because they are usually  
149 visualized as a multi-pronged fork (outlined in the dashed-line box) rather than a star pattern (compare H04 in (a)  
150 and (b)). These true biological processes also cause tree algorithms to perform poorly because they violate their

151 assumptions, slowing convergence. Additionally, MJN are able to indicate reticulations (i.e., loops) that could  
152 denote recombination, reverse mutations, or other biologically important events whereas the forced bifurcation of  
153 phylogenetic tree algorithms is unable to display these. Reference sequence: NC\_045512, Wuhan, December 24,  
154 2019.

155

### 156 *Lineage-defining mutations of Variants of Concern*

157 We processed more than 900,000 SARS-CoV-2 genomes from human and mink, built a MJN  
158 network using the 640,211 genomes that survived our quality control workflow, and annotated  
159 with PANGO lineages defined in the GISAID database (Figure 2, *see* Methods). This  
160 genealogy-based approach to molecular evolution identifies the mutations that define a given  
161 haplotype based on the edge between nodes. Here, they define the variants of concern/interest  
162 based on the edge that initiates their corresponding clusters of nodes (Table 1).

163 This approach also enables the identification of all the common features acquired in  
164 different VOC, which can elucidate the set of molecular features underlying their rapid spread.  
165 For example, the B.1.1.7, B.1.351, and P.1 variants, here referred to as late\_2020\_VOC, can all  
166 be defined by a triple amino acid deletion in the nonstructural protein 6 (nsp6; Ser<sup>106</sup>\_Phe<sup>108</sup>del)  
167 as well as Asn<sup>501</sup>Tyr in S. Notably this latter mutation has received considerable attention  
168 compared to the former (Figure 2a, Table 1), but both are likely key to the biology of these VOC.  
169 The MJN also reveals what appears to be a previous dominant but now rare variant (D.2) in  
170 Australia; an Ile<sup>120</sup>Phe mutation in nsp2 was followed immediately by S Ser<sup>477</sup>Asn, which seems  
171 to have led to its rapid expansion in April 2020, indicated by increased node size. This  
172 underscores the usefulness of the MJN approach because it is able to convey the sequence of



173 timing of mutational events and the number of individuals carrying those haplotypes  
174 simultaneously.

175 In order to account for sampling bias (there are a disproportionate number of sequences  
176 contributed to GISAID by the UK and Australia as well as the high frequency of B.1.1.7 and D.2  
177 in those two geographic locations), we plotted the number of daily samples of selected variants  
178 relative to their respective total number of cases to date (April, 2021) and compared the resulting  
179 slopes of the linear range of the curves (Figure 2c). The late\_2020\_VOC, early\_2021\_VOC, and  
180 early\_2021\_VOI (Table 1) display higher daily accumulation rates, between 1% and 3% of total  
181 observed cases per day, compared to other variants (e.g., B.1.177), which show less than 1%  
182 accumulation per day. Notably, the rapid increase in D.2 (2%) supports the MJN view of this as  
183 a likely VOC. This analysis and the MJN confirm the importance of monitoring these variants  
184 closely and identify both S and non-S mutations that define the current and potential SARS-  
185 CoV-2 VOC (Table 1).

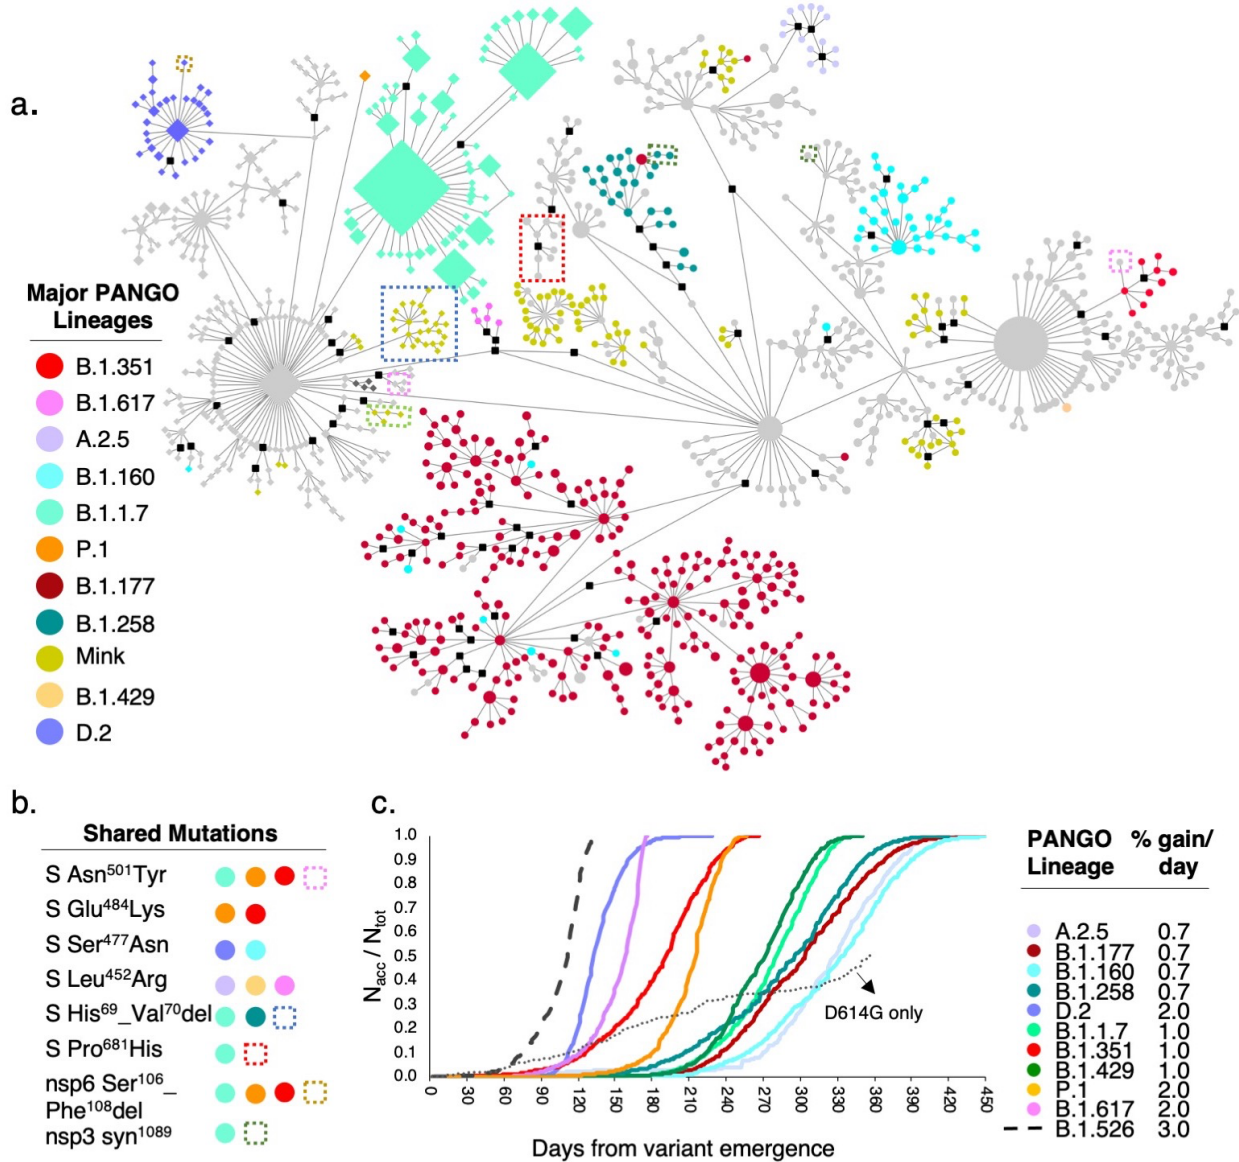

186

187 **Fig. 2. Median-joining network (MJN) of SARS-CoV-2 genomes.** **a.** MJN of haplotypes found in more than 30  
 188 individuals (N=640,211 sequences) using 2,128 variable sites. Colors identify PANGO lineages from GISAID.  
 189 Diamond-shaped nodes correspond to haplotypes carrying a three base pair deletion in the nucleocapsid gene (N) at  
 190 sites 28881-28883 (Arg<sup>203</sup>Lys, Gly<sup>203</sup>Arg). Black square nodes are inferred haplotypes, dashed-line box defines a  
 191 subgroup of haplotypes within a lineage with a disjoint mutation that is also found in B.1.1.7. Several lineages show  
 192 introgression from others (e.g., cyan nodes, B.1.160, into brick red, B.1.177). **b.** Several important mutations in S  
 193 and non-S proteins appear in multiple lineages. For example, the B.1.1.7 variant carries four mutations that are in  
 194 disjoint nodes: S Asn<sup>501</sup>Tyr, S Pro<sup>681</sup>His, a silent mutation in the codon for amino acid 1089 in nsp3, and the S

195 His<sup>69</sup>\_Val<sup>70</sup>del that is also found in a clade of haplotypes from mink (blue dashed-line box in (a)). **c.** Accumulation  
 196 rate for common GISAID lineages including VOC represented by the ratio between the accumulated number of  
 197 reported sequences of a given lineage per day since the appearance of that haplotype ( $N_{acc}$ ) divided by the  
 198 corresponding total number ( $N_{tot}$ ) at the final sample date for this study. Colors of curves correspond to node colors  
 199 in (a). All VOC display accumulation rates of at least 1% of the total for that variant per day. The remaining are  
 200 less than 1% except for the VOI B.1.526 (not displayed in MJN) that is the highest with 3% per day, indicating  
 201 further scrutiny of this variant is warranted. We also plotted the accumulation rate for lineages that carry the widely  
 202 reported S Asp<sup>614</sup>Gly mutation but without the nsp12 Pro<sup>323</sup>Leu commonly found with it, supporting our previous  
 203 hypothesis (Garvin, Prates, et al. 2020) that mutations in S alone are not responsible for the rapid transmission of  
 204 these VOC/VOI but is a function of epistasis among S and non-S mutations. Reference sequence: NC\_045512,  
 205 Wuhan, December 24, 2019.

206

207 **Table 1. Major lineages shown in the median-joining network and their defining mutations.** Center for disease  
 208 control (CDC)-defined variants and their timing are listed under *Lineages* and discussed in the text. L-VOC denotes  
 209 likely variants of concern, that is, those that we propose to have strong potential to become VOC. Non-VOC (N-  
 210 VOC) are not identified by CDC as VOC. Potential epistatic non-S mutations lineage-defining mutations are listed  
 211 for the VOC, L-VOC, and VOI. Sites in red font are discussed in the text.

| Lineage           | Class          | Spike Mutation(s)                       | Likely non-S Epistatic Partner(s)        | First major detection     |
|-------------------|----------------|-----------------------------------------|------------------------------------------|---------------------------|
| B.1               | Early_2020_VOC | D614G                                   | nsp12 P323L                              | Germany                   |
| B.1.1.7 (alpha)   | Late_2020_VOC  | N501Y, del 69-70, P681H*, T716I, D1118H | nsp6 del 106-108, N L3D, N S235Y         | United Kingdom            |
| B.1.351 (beta)    | Late_2020_VOC  | N501Y, E484K, K417N                     | nsp6 del 106-108                         | South Africa              |
| P.1 (gamma)       | Late_2020_VOC  | N501Y, E484K, K417N                     | nsp6 del 106-108                         | Brazil                    |
| B.1.427 (epsilon) | Early_2021_VOC | L452R, S13I                             | nsp13 D260Y                              | United States, California |
| B.1.429           | Early_2021_VOC | L452R, W152C                            | nsp13 D260Y                              | United States, Washington |
| B.1.617 (delta)   | Early_2021_VOC | L452R, E484Q, P681R*                    | N R203M, ORF7a V82G, ORF3a S26L          | India                     |
| A.2.5             | L-VOC          | L452R, del 142-145                      | nsp1 L4P, nsp3 K839E, nsp4 P308Y         | Panama                    |
| D.2               | L-VOC          | S477N                                   | nsp2 I120F                               | Australia                 |
| B.1.160           | N-VOC          | S477N                                   | na                                       | Denmark                   |
| B.1.177           | N-VOC          | A222V                                   | na                                       | United Kingdom/Denmark    |
| B.1.258           | N-VOC          | N434K, del 69-70                        | na                                       | Denmark                   |
| B.1.526 (iota)    | Early_2021_VOI | L5P, T95I, D253G                        | nsp6 del 106-108, nsp4 L438P, nsp13 Q88H | United States, New York   |

212 \* multibasic furin cleavage site

213

214

215 ***Recombination is the likely source for the rapidly expanding variants***

216 Haploid, clonally replicating organisms such as SARS-CoV-2 are predicted to eventually  
217 become extinct due to the accumulation of numerous slightly deleterious mutations over time,  
218 i.e., Muller's ratchet (Muller 1964). Recombination is not only a rescue from Muller's ratchet, it  
219 can also accelerate evolution by allowing for the union of advantageous mutations from  
220 divergent haplotypes (Bentley and Evans 2018). In SARS-CoV-2, recombination manifests as a  
221 template switch during replication when more than one haplotype is present in the host cell, i.e.  
222 the virus replisome stops processing a first RNA strand and switches to a second one from a  
223 different haplotype, producing a hybrid virus (Simon-Loriere and Holmes 2011). In fact,  
224 template switching is a necessary step during the negative-strand synthesis of SARS-CoV-2  
225 when the replisomes functions as an RNA-dependent RNA polymerase and pauses at  
226 transcription-regulatory motifs of the sub-genomic template to add the leader sequence from the  
227 5' end of the genome (this "recombination" is not detected if only a single strain is present, i.e.  
228 there is no variation) (Kim et al. 2020),). Given this and the fact that recombination is a major  
229 mechanism of coronavirus evolution (Boni et al. 2020) it would be improbable for this process  
230 *not* to occur in the case of multiple strains infecting a cell (Gribble et al. 2021).

231 The late\_2020\_VOC exhibits large numbers of new mutations relative to any closely  
232 related sequence indicating rapid evolution of SARS-CoV-2 (Figure 3a). For example, the  
233 original node of B.1.1.7 differs from the most closely related node by 28 mutations. However,  
234 the majority of this total (15) corresponds to deletions that could be considered two single  
235 mutational events, as does a 3-bp change in N (28280-22883) since they occur in factors of three  
236 (a codon), maintaining the coding frame. By summing the two deletions and the full codon  
237 change 3-bp change in N with the 10 remaining single site mutations, a conservative estimate

238 would be 13 distinct mutational events leading to B.1.1.7. The plot of the accumulating  
239 mutations in the 640,211 haplotypes sampled to date reveals a linear growth of roughly 0.05  
240 mutations per day (Figure 3b) and therefore, given this pace, it would be expected to take 260  
241 days for these 13 mutational events to accumulate in a haplotype. For the B.1.1.7 to appear in  
242 October 2020 as reported, the genealogy would have to have been initiated in January 2020 and  
243 yet the nearest node harboring the S Asn<sup>501</sup>Tyr mutation was not sampled until June 2020 and no  
244 intermediate haplotypes have been identified to date.

245         Alternatively, it could be that the 13 mutational events occurred between June and  
246 October (122 days), but the probability of this is about one in 10<sup>15</sup> (Supplemental Methods).  
247 Furthermore, all 28 differences between the Wuhan reference sequence and B.1.1.7 appeared in  
248 earlier haplotypes (Table S1) and therefore, if rapid evolution were the cause, it would require  
249 the extremely unlikely process of 28 independent, repeat mutations to the same nucleotide state.  
250 In order to test this, we plotted the population-level mutations per day (including repeat  
251 mutations at variable sites), which did not reveal any increase in mutation rate at the time of the  
252 B.1.1.7 and in fact displayed a *decrease* with the emergence of the late\_2020\_VOC (Figure 3c,  
253 Figure S1). Possible explanations are either a large increase in mutations in a small number of  
254 individuals over a short time period (that would have to occur on multiple continents to explain  
255 B.1.1.7, B.1.351, and P.1), or recombination between two or more divergent haplotypes carrying  
256 the VOC mutations (Figure 3d).

257         Recombination is the most parsimonious explanation given (1) the absence of a  
258 substantial increase in mutation rate at any time prior to the appearance of the VOC, (2) the  
259 widespread and early circulation of the majority of the mutations associated with them in other  
260 haplotypes and, (3) that several mutations appear disjointly across the MJN (Figure 2a). The

261 first notable disjoint mutation is Ser<sup>477</sup>Asn in S that defines D.2 along with nsp2 Ile<sup>120</sup>Phe  
262 (Figure 2a), which then appears in B.1.160. Likewise, Asn<sup>501</sup>Tyr and Pro<sup>681</sup>His in S appear in  
263 divergent haplotypes, including one mink subgroup from Denmark and a basal node to B.1.351  
264 (without the nsp6 deletion). It could be argued that those in S (Asn<sup>501</sup>Tyr, Ser<sup>477</sup>Asn, and  
265 Pro<sup>681</sup>His) are the result of multiple independent mutation events because they are under positive  
266 selection (Martin et al. 2021), but we also identified a mutation in nsp3 that is one of the lineage-  
267 defining mutations for B.1.1.7 and appears in disjoint nodes, but is unlikely to be under selection  
268 because it is synonymous. It should also be noted that recombination can generate a high  
269 number of false-positives when testing for signs of positive selection (Anisimova et al. 2003),  
270 and the complexity of coronavirus recombinants compared to those generated in diploid  
271 organisms through homologous chromosome crossovers (Figure 3d) makes that process difficult  
272 to detect. Therefore, analyses that test for positive selection based on multiple independent  
273 mutations at a site may, in fact, be false positives that result from recombination events. The  
274 majority of the mutations found in B.1.1.7 could be explained by the admixture and  
275 recombination among lineages and a random scan of 100 FASTQ files from B.1.1.7 available in  
276 the NCBI SRA database identified two co-infected individuals in further support of this  
277 hypothesis (Table S2). Large-scale analyses of these data may enable the detection of  
278 recombinants.

279

280

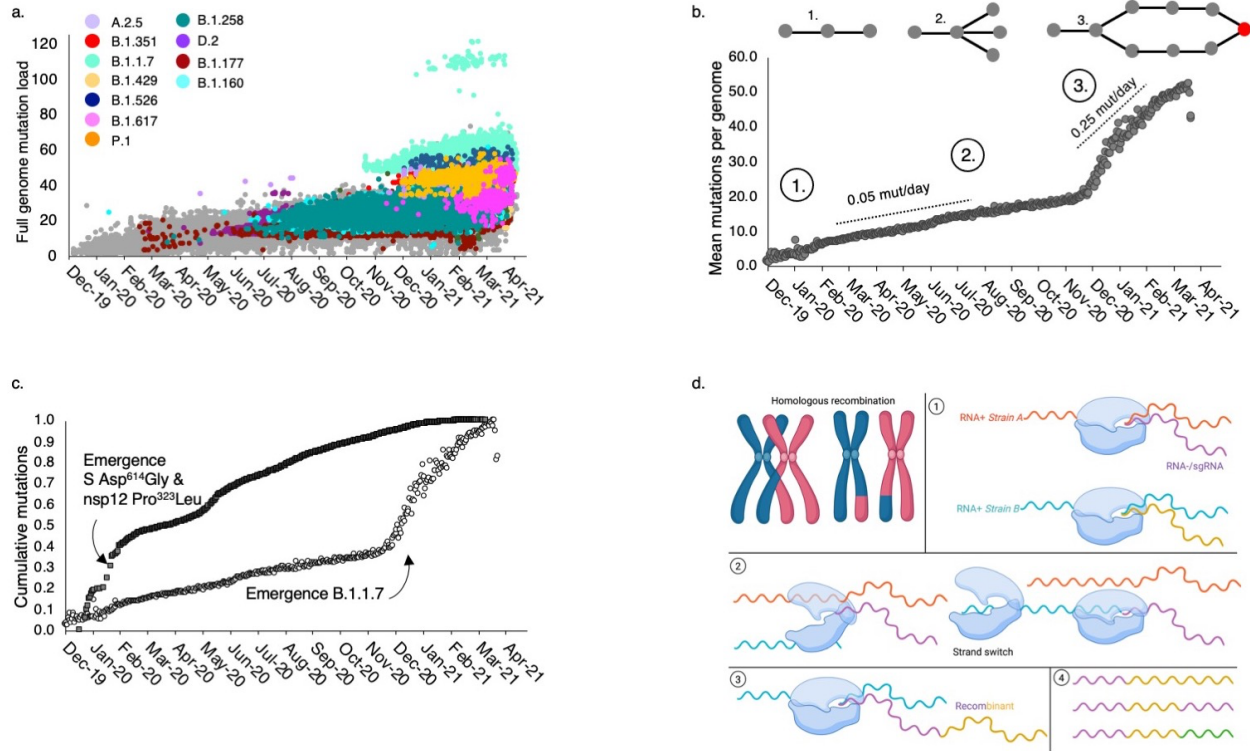

281

282 **Fig. 3 Mutation rates and genomic mutation load of SARS-CoV-2.** **a.** A rapid increase in the number of  
 283 mutations per individual genome is evident in the late\_2020\_VOC. The outliers of the B.1.1.7 lineages (mint green)  
 284 are a subset of that lineage due to a single, 57 base pair deletion in ORF7a (amino acids 5-23). **b.** Mean mutation  
 285 load per individual, based on 2,128 high-confidence sites by date. The SARS-CoV-2 virus accumulated an estimated  
 286 0.05 mutations per day until the appearance of B.1.1.7, when it increased five-fold. Circles with numbers denote  
 287 three processes occurring at different timepoints: (1) emergence, (2) haplotype expansion, and (3) recombination of  
 288 divergent lineages. **c.** A population-level analysis of new mutations per day over the same time period (dark squares)  
 289 displays a declining rate of mutations with a slight increase around the emergence of D.2 in Australia but not an  
 290 increase with the emergence of B.1.1.7 that could explain the rapid accumulation of mutations shown in (b) plotted  
 291 as percent accumulation (unfilled circles). **d.** Recombination in a diploid organism results from the crossover of  
 292 homologous chromosomes during meiosis. In RNA+ betacoronaviruses, recombination occurs when two or more  
 293 strains (haplotypes) infect a single cell (1). The replisome dissociates (2) from one strand and switches to another,  
 294 (3) generating a hybrid recombinant. The resulting chimera (4) can be as simple as a section of *strain A* fused to a  
 295 section of *strain B* or more complex recombinants if strand switching occurs more than once or there are multiple  
 296 strains per cell (green section). Reference sequence: NC\_045512, Wuhan, December 24, 2019.

297

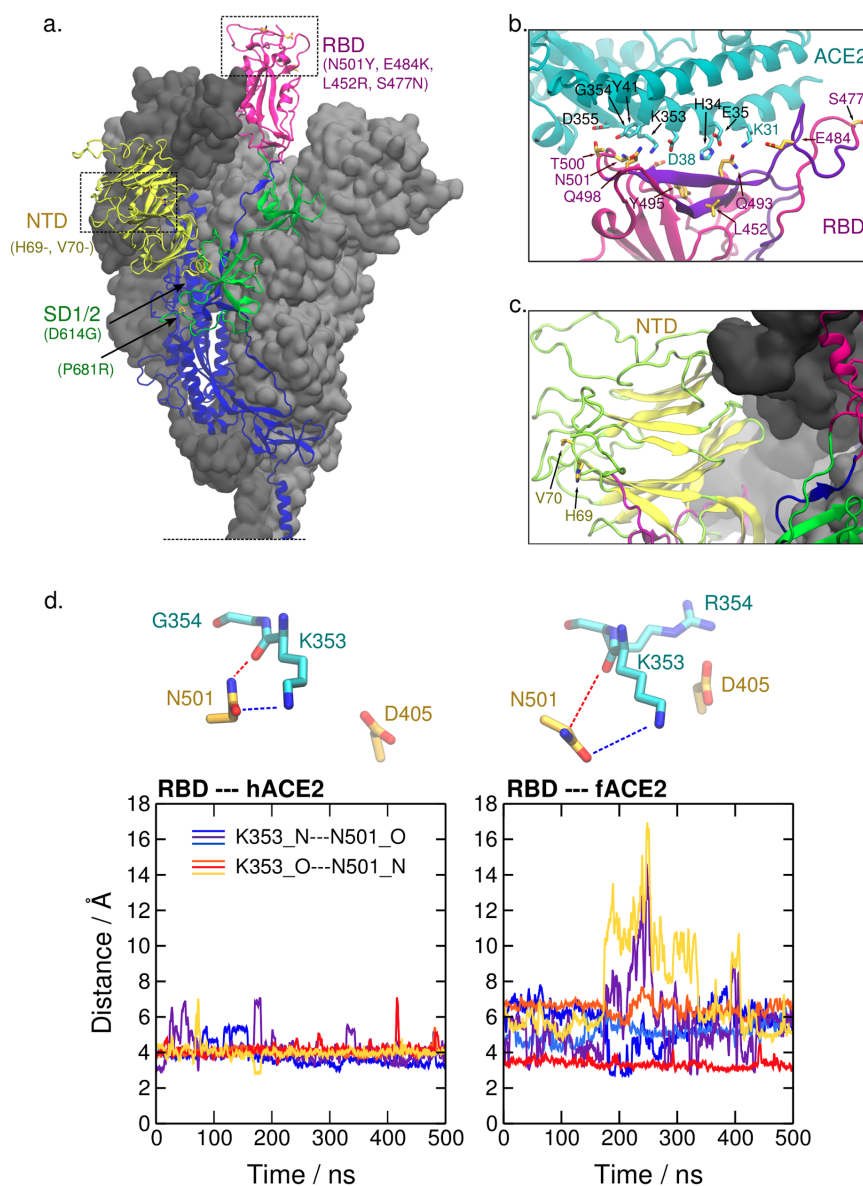

298

299 **Fig. 4. Location of mutation sites of SARS-CoV-2 VOC on the structure of the spike glycoprotein.** a. Several  
 300 mutations associated with dominant haplotypes are located in the receptor-binding domain (RBD, aa. 331-506), N-  
 301 terminal domain (NTD, aa. 13-305), and subdomains 1 and 2 (SD1/2, aa. 528-685) of S. The structure of S in the  
 302 prefusion conformation derived from PDB ID 6VSB (Wrapp et al. 2020) and completed *in silico* (Casalino et al.  
 303 2020) is shown. Glycosyl chains are not depicted, and the S trimer is truncated at the connecting domain for visual  
 304 clarity. The secondary structure framework of one protomer is represented and the neighboring protomers are shown  
 305 as a gray surface. b. Mutation sites in the S RBD of SARS-CoV-2 VOC, such as 484, 452, 477, and 501 are located



306 at or near the interface with ACE2. Notably, site 452 and 484 reside in an epitope that is a target of the adaptive  
307 immune response in humans (aa. 480-499, in violet) and site 501 is also located near it (B.-Z. Zhang et al. 2020).  
308 Dashed lines represent relevant polar interactions discussed here. PDB ID 6M17 was used (R. Yan et al. 2020). **c.**  
309 The sites 69 and 70 on the NTD, which are deleted in the VOC B.1.1.7, are also found near an epitope (aa. 21-45, in  
310 violet) (B.-Z. Zhang et al. 2020). **d.** Time progression of N---O distances between atoms of Asn<sup>501</sup> in RBD and  
311 Lys<sup>353</sup> in human and ferret ACE2 (hACE2 and fACE2, respectively) from the last 500 ns of the simulation runs.  
312 Colors in the plots correspond to the distances Lys<sup>353</sup>\_N---Asn<sup>501</sup>\_O (cold colors) and Lys<sup>353</sup>\_O---Asn<sup>501</sup>\_N (warm  
313 colors) in three independent simulations of each system. These distances are represented in the upper part of the  
314 figure.

315

### 316 ***The potential functional impact of key mutations in S and non-S proteins***

317 **Given** the results from the MJN analysis and our previous hypothesis (Garvin, Prates, et al.  
318 2020) that the cooperative effects of mutations in S and non-S proteins (i.e., epistasis) define and  
319 are responsible for the increased transmission of prevalent SARS-CoV-2 variants (Lauring and  
320 Hodcroft 2021), we performed protein structural analyses and discuss below the functional  
321 effects of these individual and combined mutations in SARS-CoV-2 VOC. We analyze ten likely  
322 key mutation sites (red font, Table 1) in S and non-S proteins.

323 *S Asn<sup>501</sup>Tyr* - Located in the receptor-binding domain (RBD) of SARS-CoV-2 S,  
324 immunoprecipitation assays reveal that site 501 plays a major role in the affinity of the virus to  
325 the host receptor, ACE2 (Shang et al. 2020). Via structural analysis and extensive molecular  
326 dynamics simulations, Ali et al. highlighted the importance of the interactions with human ACE2  
327 (hACE2) near the site 501 of the receptor-binding domain of S, particularly via a sustained  
328 hydrogen bond between RBD Asn<sup>498</sup> and hACE2 Lys<sup>353</sup> (Ali and Vijayan 2020). Deep

329 mutational scanning of SARS-CoV-2 RBD reveals that the naturally occurring mutations at site  
 330 501, Asn<sup>501</sup>Tyr and Asn<sup>501</sup>Thr, lead to an increased affinity to hACE2 (Starr et al.). Additionally,  
 331 this site is located near a linear B cell immunodominant site (B.-Z. Zhang et al. 2020), and  
 332 therefore the mutation may allow SARS-CoV-2 variants to escape neutralizing antibodies  
 333 (Figure 4, Figure 5). Indeed, neutralizing antibodies derived from vaccinations and natural  
 334 infection have significantly reduced activity against pseudotyped viruses carrying this mutation  
 335 (Wang et al. 2021).

336

337 **Table 2. Surface exposed residues of ACE2 orthologues forming the region of contact with site 501 of SARS-**  
 338 **CoV-2 S.** Relative to the human sequence, almost all these residues are either conserved (“|”) or replaced by a nearly  
 339 equivalent amino acid in mouse, American mink, European mink, ferret, and pangolin. Notably, there is a  
 340 nonconservative substitution of Gly<sup>354</sup> to a bulky positively charged amino acid in most species. Our structural  
 341 analyses suggests that this substitution contributes to a putative host-dependent selective pressure at site 501 of  
 342 SARS-CoV-2 S. Prevalent residues reported at this site are informed in order of frequency.

| Species                                 | Residues in ACE2 |     |     |     |      |      |      |      |      | S 501 |
|-----------------------------------------|------------------|-----|-----|-----|------|------|------|------|------|-------|
| <i>Homo sapiens</i> (Human)             | D38              | Y41 | Q42 | L45 | K353 | G354 | D355 | R357 | I358 | Y, N  |
| <i>Mus musculus</i> (House mouse)       |                  |     |     |     | H    |      |      |      |      | Y, N  |
| <i>Neovison vison</i> (American mink)   | E                |     |     |     |      | H    |      |      |      | N, T  |
| <i>Mustela lutreola</i> (European mink) | E                |     |     |     |      | R    |      |      |      | N, T  |
| <i>Mustela putorius furo</i> (Ferret)   | E                |     |     |     |      | R    |      |      |      | T, N  |
| <i>Manis pentadactyla</i> (Pangolin)    | E                |     |     |     |      | H    |      |      |      | N, T  |

343

344 Transmission between human and non-human hosts for SARS-CoV-2 provides further

345 information on the evolutionary selectivity of site 501 in S. Repeated infection of mice with  
 346 human SARS-CoV-2 resulted in the selection of a mouse-adapted strain carrying S Tyr<sup>501</sup> (Gu et  
 347 al. 2020). It is possible that Asn<sup>501</sup>Tyr results in an additional stabilization of the RBD-ACE2  
 348 interaction via  $\pi$ -stacking of Tyr<sup>501</sup> with Tyr<sup>41</sup> in ACE2 (Figure 4a-b). In contrast, several  
 349 introductions into farmed mink (*Neovison vison*), which caused a substantial increase in their  
 350 mortality (Oude Munnink et al. 2021), have not led to the same selection. To date, reported  
 351 sequences in GISAID of SARS-CoV-2 in this host carry either S Asn<sup>501</sup>, which is prevalent, or S  
 352 Thr<sup>501</sup>, which appeared independently in mink farms (Table S3) (Oude Munnink et al. 2021). In  
 353 ACE2 of these taxa, Tyr<sup>41</sup> is conserved, but near this site, a larger, positively charged amino  
 354 acid, His<sup>354</sup>, replaces Gly<sup>354</sup>. Table 2 shows that the amino acids in the RBD 501-binding region  
 355 of the ACE2 orthologues are conserved, except for Gly<sup>354</sup>, indicating that this site may play a key  
 356 role in viral fitness.

357

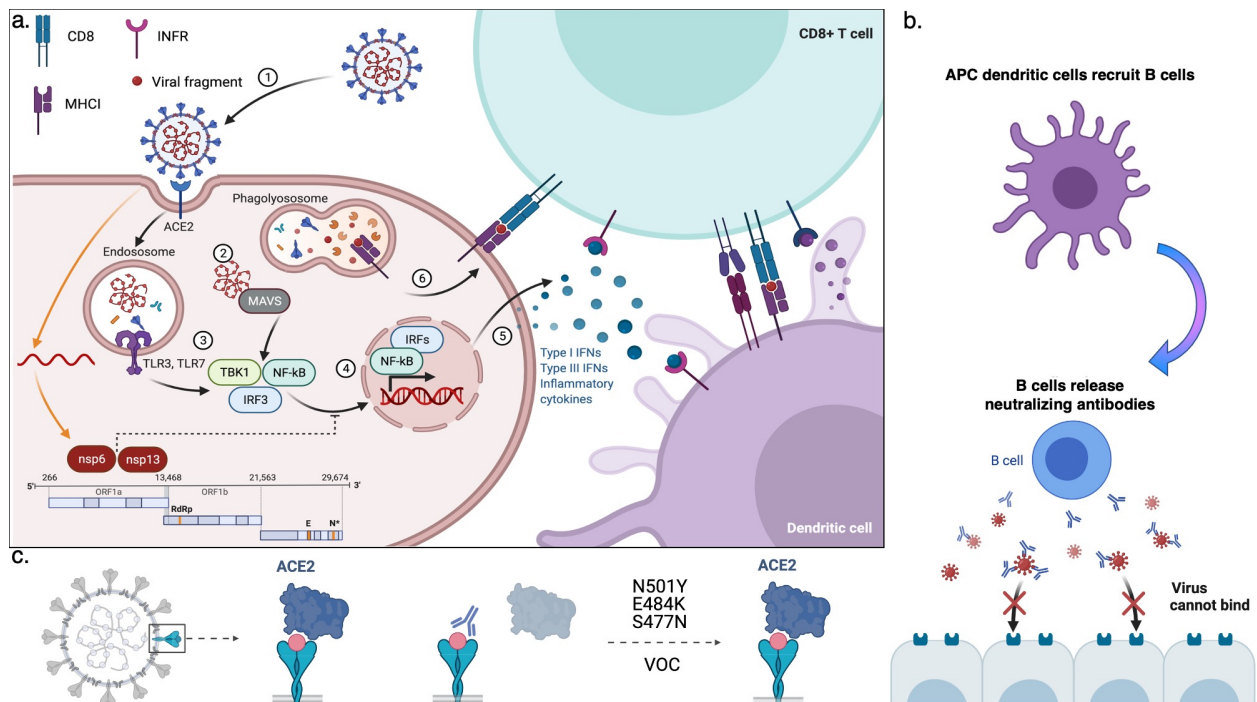

358

359 **Fig. 5. Response to viral infection. a.** As part of the innate immune response, (Step 1) the SARS-CoV-2 virus is  
360 internalized into endosomes and degraded. (Step 2) viral RNA activates the mitochondrial antiviral innate immunity  
361 (MAVS) pathway and (Step 3) degraded proteins activate the toll receptor pathway (TLR3/TLR7), which result in  
362 the (Step 4) phosphorylation of TBK1 and translocation of NF- $\kappa$ B and IRF3 to the nucleus, where they regulate the  
363 transcription of immune genes including interferons (IFNs, Step 5). IFNs recruit CD8+ T cells that, (Step 6)  
364 recognize fragments of the virus on the cell surface via their class I major histocompatibility complex (MHC I)  
365 receptors and are activated by dendritic cells (antigen processing cells, or APC). If the virus bypasses innate  
366 immunity (orange arrows) nonstructural proteins (nsp6 and nsp13) block the IRF3 nuclear translocation. **b.** APCs  
367 recruit B lymphocytes and stimulate the production of antibodies that recognize SARS-CoV-2 S (whereas T cells  
368 recognize fragments of S bound to MHC I). **c.** The neutralizing antibodies block binding of the virus to the ACE2  
369 receptor and can prevent re-infection but mutations in the receptor-binding domain (RBD), e.g., S Asn<sup>501</sup>Tyr,  
370 prevent binding of the antibodies and the virus is then able to bind the receptor again even if individuals experienced  
371 exposure to an earlier strain or were vaccinated. *Created with BioRender.com.*

372

373 Similarly, ferrets (*Mustela putorius furo*) and pangolins (*Manis pentadactyla*), relevant  
374 potential reservoirs of SARS-CoV-2, carry a large basic residue at site 354 (an arginine and  
375 histidine, respectively). Sawatzki et al. reported that the constant exposure of ferrets to infected  
376 humans did not result in natural transmission in a domestic setting, suggesting that ferret  
377 infection may require improved viral fitness (Sawatzki et al. 2021). In agreement with that,  
378 Richard et al. (Richard et al. 2020) reported that the adaptive substitution Asn<sup>501</sup>Thr was detected  
379 in all experimentally infected ferrets in the laboratory. In order to further investigate the role of  
380 the Gly<sup>354</sup> versus Arg<sup>354</sup> in the adaptive mutation of site 501 in S RBD, we performed extensive  
381 molecular dynamics simulations of the truncated complexes of Asn<sup>501</sup>-carrying RBD of SARS-  
382 CoV-2 and ACE2, from human (hACE2) and ferret (fACE2). The simulations indicate that there  
383 is a remarkable difference in the interaction pattern between the two systems in the region

384 surrounding site 501 of RBD. Firstly, we identified the main ACE2 contacts with Asn<sup>501</sup>, which  
385 were the same for both species, namely, Tyr<sup>41</sup>, Lys<sup>353</sup>, and Asp<sup>355</sup>, and we also show that the  
386 intensity of these contacts is lower in the simulations of fACE2 (Table S4).

387 To investigate further, we analyzed structural features in the interaction between ACE2  
388 Lys<sup>353</sup> and RBD Asn<sup>501</sup>. Distances between polar atoms computed from the simulations indicate  
389 a weaker electrostatic interaction between this pair of residues in ferret compared to human  
390 (Figure 4d). This effect is accompanied by a conformational change of fACE2 Lys<sup>353</sup>. Figure S2  
391 shows that, in ferret, the side chain of Lys<sup>353</sup> exhibits more stretched conformations, i.e., a higher  
392 population of the *trans* mode of the dihedral angle formed by the side chain carbon atoms. This  
393 conformational difference could be partially attributed to the electrostatic repulsion between the  
394 two consecutive bulky positively charged amino acids in ferrets, Lys<sup>353</sup> and Arg<sup>354</sup>. Additionally,  
395 the simulations suggest a correlation, in a competitive manner, between other interactions that  
396 these residues display with the RBD. For example, Figure S3 shows that the salt bridge  
397 fACE2\_Arg<sup>354</sup>---RBD\_Asp<sup>405</sup> and the HB interaction fACE2\_Lys<sup>353</sup>---RBD\_Tyr<sup>495</sup> (backbone)  
398 alternate in the simulations. This also suggests that the salt bridge formed by fACE2 Arg<sup>354</sup> drags  
399 Lys<sup>353</sup> apart from RBD Asn<sup>501</sup>, weakening the interaction between this pair of residues in ferrets  
400 relative to humans.

401 Altogether, these analyses indicate that site 354 in ACE2 significantly influences the  
402 interactions with RBD in the region of site 501 and is likely playing a major role in the  
403 selectivity of the size and chemical properties of this residue in SARS-CoV-2. We propose that,  
404 in contrast to Tyr<sup>501</sup>, a smaller HB-interacting amino acid at site 501 of RBD, such as the  
405 threonine reported in farmed mink and ferrets, may ease the interactions on the region, e.g., the  
406 salt bridge between fACE2 Arg<sup>354</sup> and RBD Asp<sup>405</sup>. The differences in the region of ACE2 in

407 contact with site 501 seem to have a key role for host adaptation and are worth further  
408 investigation as it may also reveal details of the origin of this zoonotic pandemic.

409 *S His<sup>69</sup>\_Val<sup>70</sup> deletion* - The His<sup>69</sup>\_Val<sup>70</sup> deletion (in B.1.1.7) is adjacent to a linear epitope at the  
410 N-terminal domain of S (Figure 4a,c) (B.-Z. Zhang et al. 2020), suggesting it too may improve  
411 fitness by reducing host antibody effectiveness.

412 *S Leu<sup>452</sup>Arg* - The Leu<sup>452</sup>Arg mutation in S is a core change in the early\_2021\_VOC (Table 1,  
413 Figure 4a-b). Although Leu<sup>452</sup> does not interact directly with ACE2, this mutation was shown to  
414 moderately increase infectivity in cell cultures and lung organoids using Leu<sup>452</sup>Arg-carrying  
415 pseudovirus (Deng et al. 2021). It is possible that the substitution of the leucine, hydrophobic, to  
416 arginine, a positively charged residue, creates a direct binding site with ACE2 via the  
417 electrostatic interaction with Glu<sup>35</sup>. However, in Starr et al., experiments with the isolated RBD  
418 expressed on the cell surface of yeast show that this mutation is associated with enhanced  
419 structural stability of RBD, while it only slightly improves ACE2-binding (Starr et al.). An  
420 alternative but not mutually exclusive hypothesis is that it causes a local conformational change  
421 that impacts the complex dynamic interchange between interactions of RBD with the spike  
422 trimer itself and with the host receptor. Noteworthy, site 452 resides in a significant  
423 conformational epitope in RBD and Leu<sup>452</sup>Arg was shown to decrease binding to neutralizing  
424 antibodies (Figure 4b) (Deng et al. 2021; Li et al. 2021).

425 As noted in Deng et al., S Leu<sup>425</sup>Arg has been reported in rare variants starting in March 2020  
426 from Denmark, i.e., several months before the surge of the VOC that carry this mutation  
427 (B.1.427, B.1.429, and B.1.617) (Deng et al. 2021). This indicates that the high transmissibility  
428 of the early\_2021\_VOC is not fully explained by the increased infectivity caused by Leu<sup>425</sup>Arg

429 and combined mutations may be essential for the rapid spread. Besides the other mutations in the  
430 spike in these VOC, the substitution Asp<sup>260</sup>Tyr in the SARS-CoV-2 helicase (nsp13, below) is  
431 especially interesting, as it was identified in the MJN analysis as a defining mutation of both  
432 B.1.427 and B.1.429 variants.

433 *S Ser<sup>477</sup>Asn* - Variants carrying the S Ser<sup>477</sup>Asn mutation spread rapidly in Australia (Figure 1,  
434 Figure 3b). This site, located at the loop  $\beta$ 4-5 of the RBD, is predicted not to establish persistent  
435 interactions with ACE2 (Ali and Vijayan 2020). However, deep scanning shows that this  
436 mutation is associated with a slight enhancement of ACE2-binding. Molecular dynamics  
437 simulations suggest that Ser<sup>477</sup>Asn affects the local flexibility of the RBD at the ACE2-binding  
438 interface, which could be underlying the highest binding affinity with ACE2 reported from  
439 potential mean force calculations (Singh et al.). Additionally, this site is located near an epitope  
440 and may alter antibody recognition and counteract the host immune response (Figure 4b).

441 *S Glu<sup>484</sup>Lys* - A recent computational study suggests that Glu<sup>484</sup> exhibits only intermittent  
442 interactions with Lys<sup>31</sup> in ACE2 (Ali and Vijayan 2020). Deep scanning shows that this mutation  
443 is associated with higher affinity to ACE2 (Starr et al.) and may be explained by its proximity to  
444 Glu<sup>75</sup> in ACE2, which would form a salt bridge with Lys<sup>484</sup>. Aside from the potential impact of  
445 Glu<sup>484</sup>Lys between virus-host cell interaction, this site is part of a linear B cell immunodominant  
446 site (B.-Z. Zhang et al. 2020) and this mutation was shown to impair antibody neutralization  
447 (Wang et al. 2021).

448 *S Pro<sup>681</sup>Arg and Pro<sup>681</sup>His* - These mutations in the multibasic furin cleavage site are particularly  
449 relevant given the importance of this region for cell-cell fusion (Hoffmann et al. 2020; Papa et  
450 al.). The presence of the multibasic motif of SARS-CoV-2 has shown to be essential to the

451 formation of syncytia (i.e., multinucleate fused cells), and thus it is thought to be a key factor  
452 underlying pathogenicity and virulence differences between SARS-CoV-2 and other related  
453 betacoronaviruses. Hoffmann et al. recognized the importance of the furin cleavage site in  
454 SARS-CoV-2 and its biochemically basic signature and generated mutants to determine the  
455 effects of specific amino acids. Notably, they showed that pseudotyped virion particles bearing  
456 mutant SARS-CoV-2 S with additional basic residues in this region, including the substitution  
457 Pro<sup>681</sup>Arg (present in B.1.617), exhibits a remarkable increase in syncytium formation in lung  
458 cells *in vitro* (Hoffmann et al. 2020), which may explain the increased severity of the disease  
459 (Sheikh et al. 2021). Hoffman et al did not include a Pro<sup>681</sup>His change that is a defining mutation  
460 of B.1.1.7, and so it is not known if this too increases syncytium formation given that it is a basic  
461 amino acid, but should be the target of future studies.

462 *Nucleocapsid Arg<sup>203</sup>Met* - The main function of the nucleocapsid (N) protein in SARS-CoV-2 is  
463 to act as a scaffold for the viral genome and it is also the most antigenic protein produced by the  
464 virus (Dutta et al. 2020). In a previous study, we reported that the Ser-Arg-rich motif of this  
465 protein (a.a. 183-206), shown *in vitro* to be necessary for viral replication (Tylor et al. 2009;  
466 Garvin, Prates, et al. 2020), displays a high number of amino acid changes during the COVID-  
467 19 pandemic and is likely under positive selection. We propose that the RNA gene segment  
468 coding this particular subsequence may be linked to improved fitness of specific SARS-CoV-2  
469 haplotypes including the rapidly spreading Delta variant and is linked to epigenetic alterations  
470 (Figure 6a).

471 A recent deep transcriptome sequencing study used Oxford Nanopore<sup>TM</sup> technology to  
472 detect epigenetic modifications at 41 sites in the RNA genome that are associated with leader  
473 sequence addition to sub-genomic RNA transcripts, a recombination-like process of SARS-CoV-



474 2 (Kim et al. 2020). Nanopore instruments can detect epigenetic modifications based on  
475 disruptions of the electrical current as the RNA molecule passes through the molecular pore  
476 (Rand et al. 2017; Simpson et al. 2017), which Kim et al propose is responsible for the pause that  
477 occurs before leader sequence addition. Twenty-five of the 41 modified sites reside in the N gene  
478 and the majority of the sites in this subset are found near the Ser-Arg-rich motif (Figure 6a).

479         Furthermore, one specific epigenetic site is linked to two highly successful SARS-CoV-2  
480 haplotypes. The first is a triple mutation at sites 28881-28883 (GGG to AAC, Arg<sup>203</sup>Lys) that is  
481 now found in nearly half of all sequences sampled across the globe (diamond nodes, Figure 1)  
482 and the second is Arg<sup>203</sup>Met, which is a defining mutation for the rapidly spreading B.1.617.  
483 Notably, this region of the genome is highly conserved across several hundred years of  
484 coronavirus evolution (Boni et al. 2020) (Figure 6a). Given that these epigenetic sites were  
485 discovered because the RNA pauses as it passes across the pore of the molecular nanopore  
486 sequencer, one interesting hypothesis is that mutations at this region remove the epigenetic  
487 modification and speed the SARS-CoV-2 genome through the replisome (Figure 6b), increasing  
488 the production of virions, which is consistent with the more than 1000-fold higher virion count in  
489 those infected with B.1.617 (Lu et al.).

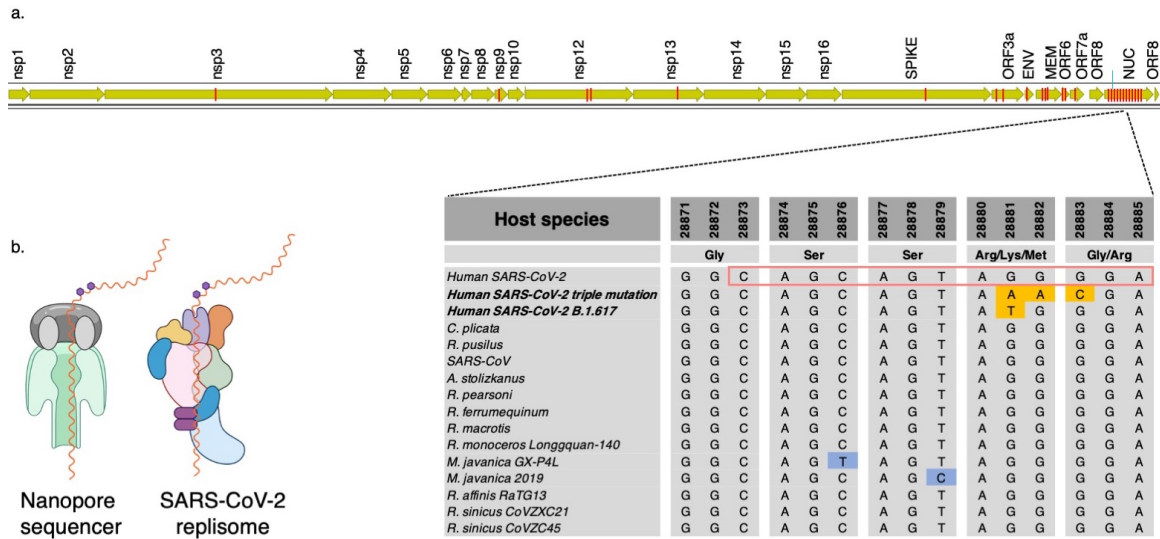

490

491 **Fig. 6. Modifications at the Ser-Arg-rich region of N may affect replication speed.** a. Location of 41 epigenetic  
 492 sites reported in Kim et al. 2020 (red bars on SARS-CoV-2 genome). One of the sites in the nucleocapsid gene  
 493 (nucleotides in red box of aligned sequences) is highly conserved across diverse host-defined coronaviruses. All bats  
 494 and human coronavirus species from China are completely conserved at the epigenetic site 28881-28883, except for  
 495 a 3-bp mutation in SARS-CoV-2 that occurred early in the pandemic and now corresponds to ~50% of all sequences  
 496 globally (diamond nodes in Figure 1). b. Kim et al. proposed that  $N^6$ -methyladenosine modification of the genome  
 497 (purple hexagons), common in RNA viruses, caused the strand to pause while traversing the nanopore sequencing  
 498 apparatus. We propose that loss of this site via mutations at site 203 in N may increase the replication rate of the  
 499 RNA strand through the SARS-CoV-2 replisome. *Aselliscus stoliczkanus* - Stoliczka's trident bat, *Chaerephon*  
 500 *plicata* - wrinkle-lipped free-tailed bat, *Rhinolophus pusillus* - least horseshoe bat, *R. pearsoni* - Pearson's horseshoe  
 501 bat, *R. macrotis* - big-eared horseshoe bat, *R. ferrumequinum* - greater horseshoe bat, *R. monoceros* - Formosan  
 502 lesser horseshoe bat, *R. affinis* intermediate horseshoe bat, *R. sinicus* Chinese rufous horseshoe bat, *R. mayalanis* -  
 503 Mayalan horseshoe bat, *SARS* - Severe Acute Respiratory Syndrome, *Manis javanica* - Malayan pangolin. Created  
 504 with BioRender.com.

505

506

507 *nsp2 Ile<sup>120</sup>Phe* - The main role of the nonstructural protein 2 (nsp2) in viral performance is not  
508 yet defined. Instead, this protein appears to be part of multiple interactions with host proteins  
509 involved in a range of processes including the regulation of mitochondrial respiratory function,  
510 endosomal transport, and ribosome biogenesis (Verba et al. 2021). Very recently, deep learning-  
511 based methods of structure prediction and cryo-electron microscopy density were combined to  
512 provide the atomic model of nsp2 (PDB id 7MSW). In a preprint from Verba et al., structural  
513 information was used to localize the surfaces that are key for protein-protein interaction with  
514 nsp2 (Verba et al. 2021). From structural analysis and mass spectrometry experiments, the  
515 authors pose the interesting hypothesis that nsp2 interacts directly with ribosomal RNA via a  
516 highly conserved zinc ribbon motif to bring ribosomes close to the replication-transcription  
517 complexes.

518 Here we are particularly interested in the functional impact of the mutation Ile<sup>120</sup>Phe in nsp2  
519 present in the D.2 variant. Site 120, identified in the nsp2 structure on Figure 7a, is a point of  
520 hydrophobic contact between a small helix, rich in positively charged residues, and a zinc  
521 binding site. The positively charged surface of the helix may be especially relevant for a putative  
522 interaction with the phosphate groups from ribosomal RNA. Normal mode analysis from  
523 DynaMut2 predicts that the substitution has a destabilizing effect in the protein structure  
524 (estimated  $\Delta\Delta G^{\text{stability}} = -2$  kcal/mol) (Rodrigues et al. 2021). Possibly, this could be caused by  $\pi$ -  
525  $\pi$  stacking interactions of the tyrosine with aromatic residues in the same helix that would disrupt  
526 the contacts anchoring it to the protein core (Figure 7b). Additionally, site 120 is spatially close  
527 to Glu<sup>63</sup> and Glu<sup>66</sup>, which were shown to be relevant for interactions with the endosomal/actin  
528 machinery via affinity purification mass spectrometry in HEK293T cells. Remarkably, upon

529 mutation of these glutamates to lysines, there is increased interactions with proteins involved in  
530 ribosome biogenesis (Verba et al. 2021).

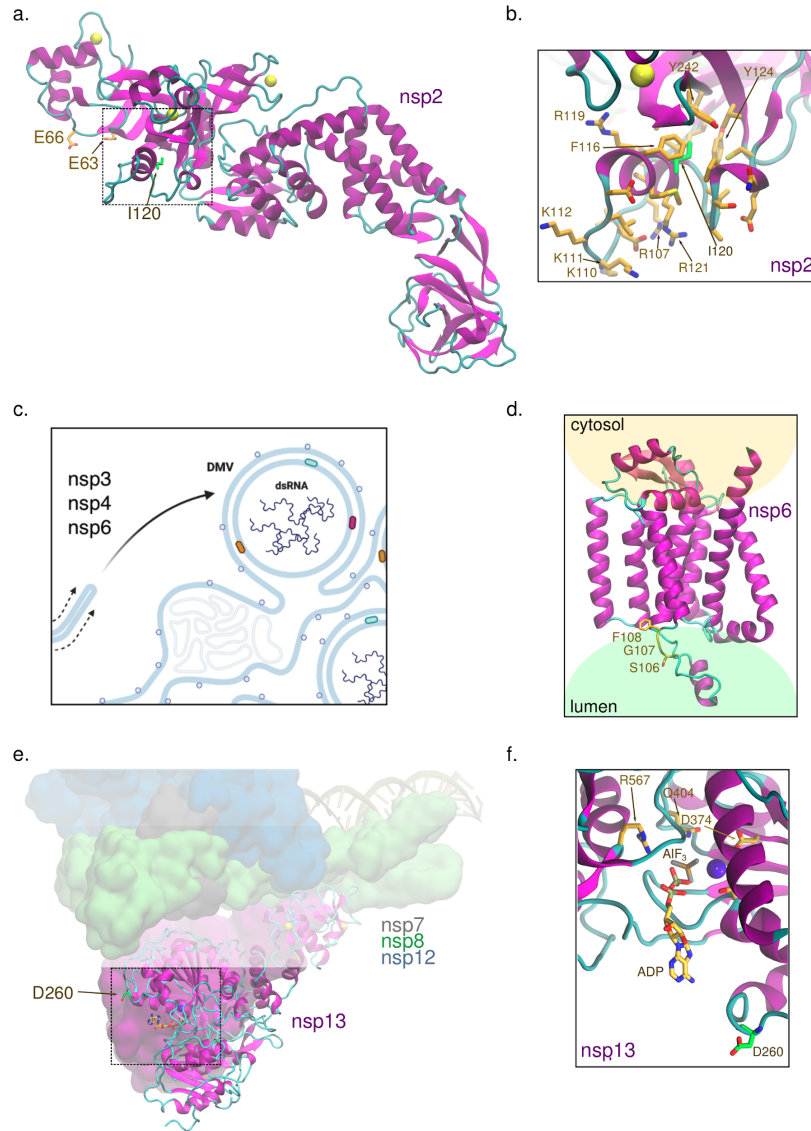

531

532 **Fig. 7. Location of mutations of prevalent SARS-CoV-2 variants on the structure of the nonstructural**  
533 **proteins nsp2, nsp6, and nsp13. a.** Site 120 in nsp2 is located in a small helix near a zinc-binding site and residues  
534 Glu<sup>63</sup> and Glu<sup>66</sup>, which play a role in the interaction with proteins involved in ribosome biogenesis and in the  
535 endosomal/actin machinery (Verba et al. 2021). PDB id 7MSW was used. **b.** Ile<sup>120</sup> forms some of the hydrophobic  
536 contacts that anchor the helix at the surface of nsp2, where this site resides, to the protein core. **c.** Nsp6 participates  
537 in generating double-membrane vesicles (DMV) for viral genome replication. Natural selection for the biological

538 traits of viral entry and replication may explain the increased transmission of variants with adaptive mutations in  
539 both S and nsp6. DMVs isolate the viral genome from host cell attack to provide for efficient genome and sub-  
540 genome replication and generate virions. **d.** Sites 106-108 are predicted to be located at/near the protein region of  
541 nsp6 embedded in the endoplasmic reticulum lumen (structure generated by AlphaFold2 (Jumper et al.)). **e.** Nsp13 is  
542 the SARS-CoV-2 helicase, and it is part of the replication complex. **f.** Asp<sup>260</sup> in nsp13 is mutated to tyrosine in  
543 B.1.427 and B.1.429 and it is located at the entrance of the NTP-binding site. PDB id 6XEZ was used (Chen et al.  
544 2020).

545 *nsp6 Ser<sup>106</sup>\_Phe<sup>108</sup>deletion* - The nsp6 protein plays critical roles in viral replication and  
546 suppression of the host immune response (Figure 5a and Figure 7c) (Gupta et al. 2020). Along  
547 with nsp3 and nsp4, nsp6 is responsible for producing double-membrane vesicles from the  
548 endoplasmic reticulum (ER) to protect the viral RNA from host attack and increase replication  
549 efficiency (Figure 7c) (Santerre et al. 2020). The nsp6 Ser<sup>106</sup>\_Phe<sup>108</sup>del is predicted to be located  
550 at a loop in the interface between a transmembrane helix and the ER lumen based on a  
551 preliminary structural analysis of the model generated by the AlphaFold2 system (Figure 7d),  
552 and we hypothesize that the deletion may affect functional interactions of nsp6 with other  
553 proteins. In addition, in agreement with the enhanced suppression of innate immune response  
554 reported for B.1.1.7 (Thorne et al. 2021), changes in immune-antagonists, such as nsp6  
555 Ser<sup>106</sup>\_Phe<sup>108</sup>del, may be key to prolonged viral shedding (Calistri et al. 2021).

556 *nsp13 Asp<sup>260</sup>Tyr* - The nonstructural protein 13 is a component of the viral replication-  
557 transcription complex, (nsp13; or SARS-CoV-2 helicase) and plays an essential role in  
558 unwinding the duplex oligonucleotides into single strands in a NTP-dependent manner (L. Yan et  
559 al. 2020). Hydrogen/deuterium exchange mass spectrometry demonstrates that the helicase and  
560 NTPase activities of SARS-CoV nsp13 are highly coordinated, and mutations at the NTPase  
561 active site impair both ATP hydrolysis and the unwinding process (Jia et al. 2019). Here we note

562 that the substitution Asp<sup>260</sup>Tyr, present in B.1.427 and B.1.429, is located at the entrance of the  
563 NTPase active site and may favor  $\pi$ - $\pi$  stacking interactions with nucleobases (Figure 7e-f). Given  
564 that, at high ATP concentrations, SARS-CoV nsp13 exhibits increased helicase activity on  
565 duplex RNA (Jang et al. 2020), it is possible that, similarly, the putative optimization on NPT  
566 uptake in nsp13 Asp<sup>260</sup>Tyr favors RNA unwinding.

567 Additionally, nsp13 was shown to play an important role as an innate immune antagonist  
568 (Figure 5a). It contributes to the inhibition of the type I interferon response by directly binding to  
569 TBK1 and, with that, it impedes IRF3 phosphorylation (Guo et al. 2021). The dual role of nsp6  
570 and nsp13 in immune suppression and viral replication may suggest a convergent evolution of  
571 SARS-CoV-2 manifested in most of the VOC, which carries either nsp6 Ser<sup>106</sup>\_Phe<sup>108</sup>del or  
572 nsp13 Asp<sup>260</sup>Tyr.

573

### 574 **3. Concluding Remarks**

575 From our thorough analysis of the spatiotemporal relationships of SARS-CoV-2 variants, we  
576 propose that the rapid increase of mutations in the late 2020 VOC is likely a consequence of the  
577 recombination of haplotypes carrying adaptive mutations in S and in non-S proteins that act  
578 cooperatively to enhance viral fitness. For example, as indicative of that, we call attention to five  
579 mutations that occur independently in disjoint clusters of our MJN, four of which (S Asn<sup>501</sup>Tyr,  
580 S His<sup>69</sup>\_Val<sup>70</sup>del, S Phe<sup>681</sup>His/Arg, and nsp6 Ser<sup>106</sup>\_Phe<sup>108</sup>del) are shared by different VOC,  
581 including B.1.1.7. Notably, S His<sup>69</sup>\_Val<sup>70</sup>del appeared in human and mink populations  
582 simultaneously in August 2020, prior to the emergence of B.1.1.7, indicating that mink should be  
583 further investigated as a possible component of a recombination event. In turn, our molecular

584 dynamics simulations indicate that the molecular forces at site 501 in S and how they are altered  
585 upon mutation (S Asn<sup>501</sup>Tyr in B.1.1.7) are a key component to describe the history of  
586 transmission among other putative zoonotic reservoirs, such as farmed minks, ferrets, and  
587 pangolins.

588         The S Asp<sup>614</sup>Gly mutation has been shown to increase infectivity and is now predominant  
589 in the circulating virus (L. Zhang et al. 2020), and S Asn<sup>501</sup>Tyr is associated with higher  
590 virulence (Gu et al. 2020). We show that the expansion of the strains carrying these mutations  
591 only occurred upon the additional substitutions in nsp12 Leu<sup>323</sup>Pro (Figure 2b) (Garvin, Prates, et  
592 al. 2020) and nsp6 Ser<sup>106</sup>\_Phe<sup>108</sup>del, respectively. A hypothesis consistent with these  
593 observations is that the changes in S enhance viral entry into the host cells but they do not easily  
594 transmit due to rapid suppression by a robust innate immune response. A secondary mutation is  
595 able to counteract the immune-driven suppression. In the case of S Asp<sup>614</sup>Gly, the nsp12  
596 Leu<sup>323</sup>Pro may have increased the replication rate of the virus, which was supported by  
597 quantitative PCR from clinical samples with different viral strains in Korber et al. (Garvin,  
598 Prates, et al. 2020; Korber et al. 2020). However, the separate effects of S Asp<sup>614</sup>Gly and nsp12  
599 Leu<sup>323</sup>Pro could not be described in the referred study because it did not include individuals  
600 infected with variants harboring only one of the mutations.

601         For the late 2020 VOC, nsp6 Ser<sup>106</sup>\_Phe<sup>108</sup>del may affect viral replication in DMVs or  
602 suppress the interferon-driven antiviral response (Xia et al. 2020). It is likely that other mutations  
603 also enhance viral mechanisms that impair the host immune response. For example, Thorne et al.  
604 recently showed that the B.1.1.7 VOC suppresses the innate immune response by host cells *in*  
605 *vitro* and attributed it to the increased transcription of the *orf9b* gene, nested within the gene  
606 coding the nucleocapsid protein. (Thorne et al. 2021), although they could not rule out the

607 possibility that this was due to nsp6 Ser<sup>106</sup>\_Phe<sup>108</sup>del.

608 Via focused protein structural analysis, we identify other mutations shared among  
609 different VOC that reside in key locations of proteins involved in viral replication and/or in  
610 suppressing the innate immune suppression, such as nsp13, suggesting a convergent evolution of  
611 SARS-CoV-2. This emphasizes the importance of tracking mutations in a genome-wide manner  
612 as a strategy to avoid the emergence of future VOC. For example, an earlier dominant variant in  
613 Australia (D.2) that carried the mutations Ser<sup>477</sup>Asn in S and Ile<sup>120</sup>Phe in nsp6 was successfully  
614 restrained. However, we note that variants harboring only the S Ser<sup>477</sup>Asn substitution are  
615 currently circulating in several European countries (Figure 2, Table S5) and may only need to  
616 recombine with a variant carrying an advantageous complementary mutation to become the next  
617 VOC.

618 A second and equally significant outcome from recombination-driven haplotypes is the  
619 generation of variants that allow escape from neutralizing antibodies produced by an adaptive  
620 immune response (Garvin, T Prates, et al. 2020) (Figure 5c). As a case in point, the resurgence of  
621 COVID-19 in Manaus, Brazil, in January 2021, where seroprevalence was above 75% in October  
622 2020, is due to immune escape of new SARS-CoV-2 lineages (Sabino et al. 2021). Broad disease  
623 prevalence and community spread of COVID-19 increase the probability that divergent  
624 haplotypes may come in contact, thereby dramatically accelerating the evolution and  
625 transmission of the virus. This emphasizes that regions with low sequence surveillance can be  
626 viral breeding grounds for the next SARS-CoV-2 VOC. Lastly, it is apparent that the adaptive  
627 evolution of the SARS-CoV-2 virus to vaccinated individuals is generating forms that are  
628 harmful to those who are unvaccinated, making it clear that a multi-pronged approach that  
629 includes increased vaccination rates, accurate predictive models of VOC, and more effective



630 treatments against disease will be necessary if we are to put this pandemic behind us.

631

## 632 **4. Methods**

### 633 *Sequence data pre-processing*

634 We downloaded SARS-CoV-2 sequences in FASTA format and corresponding metadata from  
635 GISAID and processed as we have reported previously (Garvin, Prates, et al. 2020; Prates et al.  
636 2021). To ensure that deletions were accounted for, full genome sequences were aligned with  
637 MAFFT (Kato et al. 2002) to the established reference genome (accession NC\_045512),  
638 uploaded into CLC Genomics Workbench, and trimmed to the start and stop codons (nsp1 start  
639 site and ORF10 stop codon). Aligned sequences in tab-delimited format were imported into R to  
640 count the number of variable accessions at each of the 29,409 sites.

641 Variable sites were determined with all sequences downloaded up through the end of  
642 January, 2021. In order to reduce false-positive mutation sites (those that were due to technical  
643 error), we selected sites that were variable in 25 or more individuals (0.01%) compared to the  
644 reference (all 25 were required to be the same state: A, G, T, C, or -). We further pruned these  
645 by removing sites in which 20% or more of the accessions harbored an unknown character state  
646 (“N”), leaving 2,128 variable sites for downstream analyses. After removing sequences with an  
647 “N” at any of these sites, we retained 280,409 individuals. Prior to submission, we updated the  
648 number of sequences through April 19, 2021, keeping the same 2128 variable sites, which  
649 allowed us to capture the most up-to date metadata and produced 640,211 for analysis. We kept  
650 haplotypes that occurred in more than 35 individuals to remove rare or artifact-derived

651 haplotypes. For the comparison of median-joining networks and phylogenetic trees, we used  
652 sequences from the pandemic sampled through the end of April 2020. We used variable sites  
653 found in more than ten individuals and haplotypes found in five or more individuals as we had in  
654 previous work (Garvin, Prates, et al. 2020). This produced 410 unique haplotypes based on 467  
655 variable sites.

656

#### 657 *Median-joining network (MJN)*

658 Haplotypes were coded in NEXUS format and uploaded to PopArt (Leigh and Bryant 2015). An  
659 MJN was produced with the epsilon parameter set to 0. The networks were exported as a table  
660 and visualized in Cytoscape (Shannon et al. 2003) with corresponding metadata. The date of  
661 emergence of each haplotype was defined by the sample date subtracted from the report date for  
662 the Wuhan reference sequence (December 24, 2019) and then one day was added to remove  
663 zeros. For samples that only reported the month but no day, we recorded the day as the 15th of  
664 that month. We excluded samples with no sampling date.

665

#### 666 *Phylogenetic tree*

667 We used the program MrBayes to generate a phylogenetic tree (Ronquist and Huelsenbeck  
668 2003). Parameters were set to *Nucmodel=4by4*, *Nst=6*, *Code=Universal*, and *Rates=Invgamma*.  
669 We performed 5,000,000 mcmc generations, which produced a stable standard deviation of split  
670 frequencies of 0.014. A consensus tree was generated using the 50% majority rule and visualized  
671 using FigTree v1.4.4 (<http://tree.bio.ed.ac.uk/software/figtree/>).

672

673 *Estimation of genome mutation load*

674 We estimated the mutation load using two data sets. First, we used the 640,211 sequences based  
675 on 2,128 variable sites used for the MJN because these represent high-confidence mutations. For  
676 each of the 640,211 accessions, we counted the number of differences of the 2,128 variable sites  
677 compared to the reference genome (accession NC\_045512) and recorded the day of emergence.  
678 The mutational load for all accessions for a given day was then averaged and this was plotted  
679 across time. For the second estimate of mutation rate, we used all variable sites across the full  
680 genome (29,409 sites) to include rare variants and removed all sequences with at least one  
681 ambiguous site, leaving 584,119 accessions.

682 For the population-level estimate of mutation accumulation, we applied the filters used to  
683 identify the 2,128 variable sites that were used for the MJN for all sequences up through April  
684 19, 2021. We did not include new mutations because the B.1.1.7 VOC and its downstream  
685 haplotypes had become the predominant variants globally at that time and, consequently, much  
686 early information of the molecular evolution is lost when applying frequency filters on the entire  
687 GISAID database. This is exacerbated with the MJN approach because the software algorithm  
688 used to generate the network is computationally intractable with greater than 1,000 haplotypes  
689 and therefore future efforts will either need to ignore early molecular events or use new methods  
690 that can handle the large datasets and any recombination events that occur (an alternative  
691 approach would be to now use the Alpha or Delta variant as the reference sequence because they  
692 are now the predominant strains globally).

693 For calculations of population-level mutation accumulation, it is possible (and necessary)  
694 to include all sequences to determine if mutation or recombination are the cause of the high  
695 mutation load seen in the late 2020 VOC. After applying the frequency and haplotype filters, we  
696 retained 5,011 variable sites that define 12,282 unique haplotypes for further analysis. Mutations  
697 to five possible states (A, G, T, C, and -) were counted at each site on the first date that they  
698 appeared and their appearance at later dates were excluded. Multiple mutations at a site to  
699 different states were counted with this method.

700 For lineage-specific mutation curves, we extracted all sequences based on their PANGO  
701 lineage listed in the metadata from GISAID that also had a sample data and plotted the  
702 cumulative number over time, where time is represented by days from first appearance. To  
703 estimate the rate of accumulation, we calculated the slope for the linear portion of each of the  
704 curves.

705

#### 706 *Probability of mutation accumulation*

707 To calculate the chance of accumulating several mutations in a certain period, the probability  
708 density function for a normal distribution is used:

$$709 \text{ PDF}(x) = \exp(-(x - \mu)^2 / 2\sigma^2) / \text{sqrt}(2 \pi * \sigma^2),$$

710 where  $\mu$  is the expected number of mutations for that date,  $x$  is the measured value, and  $\sigma$  is the  
711 standard deviation of error calculated from the data shown in Fig. 1b, considering the difference  
712 between the actual and predicted number of mutations. The expected value of mutations  $\mu$  for a  
713 given time period is computed from the estimated rate of mutations per day (Figure 3, 0.05). c.

714 The period of interest to our discussion (June-October 2020) corresponds to 122 days, for which,  
715 the integral of  $PDF(x=13)$  gives the probability of  $1 \cdot 10^{-15}$  to accumulate 13 mutational events.

716

#### 717 *Screen for coinfecting individuals with UK B.1.1.7*

718 We extracted 25 samples from the Sequence Read Archive at NCBI for each of the months of  
719 October, November, December, and January listed as variant B.1.1.7 from the UK (Table S2) for  
720 a total of 100 samples to check for coinfection. The reads were mapped to the NC\_045512  
721 Wuhan reference using CLC Genomics Workbench using the default parameters except for  
722 length fraction and similarity fraction were set to 0.9. Three sites specific to UK B.1.1.7 were  
723 analyzed for possible heterozygosity. Of the 100 we sampled, two appeared to be cases of  
724 coinfection. This supports the hypothesis that the large expansion in overall mutations seen in  
725 UK B.1.1.7 are likely due to recombination. In addition, it also supports the case that coinfection  
726 is occurring at a baseline sufficient to allow for occasional recombination.

727

#### 728 *Protein structure analysis*

729 VMD was used to visualize the protein structures and analyze the potential functional effects of  
730 mutations (Humphrey et al. 1996). Figure 3 was created using Inkscape (<https://inkscape.org/>)  
731 and Gimp 2.8 (<https://www.gimp.org>) (Anon).

732

#### 733 *Molecular dynamics simulations*

734 Molecular dynamics (MD) simulations were used to study interactions between SARS-CoV-2  
735 RBD and ACE2 from ferret and human. Three independent extensive MD simulations were  
736 performed for each species using GROMACS 2020 package (Lindahl et al. 2020) and the  
737 CHARMM36 force field for protein and glycans (Guvench et al. 2011; Huang and MacKerell  
738 2013). Each simulation ran up to 800 ns, being the last 500 ns used for analysis. PDB id 6M17  
739 was used to build the ACE2-RBD complexes. Given the high sequence identity between human  
740 and ferret ACE2 (83%), we performed local modeling of the non-conserved amino acid residues  
741 in ferret ACE2 using the human homolog as the template, via RosettaRemodel (Huang et al.  
742 2011).

743         The inputs for simulations were generated using CHARMM-GUI (Jo et al. 2008).  
744 Counterions were added for electroneutrality (0.1 M NaCl). The complexes were surrounded by  
745 TIP3P water molecules to form a layer of at least 10 Å relative to the box borders (Jorgensen et  
746 al. 1983). Simulations were performed using the NPT ensemble. The temperature was  
747 maintained at 310 K with the Nosé–Hoover thermostat using a time constant of 1.0 ps (Evans  
748 and Holian 1985). The pressure was maintained at 1 bar with the isotropic Parrinello–Rahman  
749 barostat using a compressibility of  $4.5 \times 10^{-5} \text{ bar}^{-1}$  and a time constant of 1.0 ps in a rectangular  
750 simulation box (Parrinello and Rahman 1981). The particle mesh Ewald method was used for the  
751 treatment of periodic electrostatic interactions with a cutoff distance of 1.2 nm (Darden et al.  
752 1993). The Lennard–Jones potential was smoothed over the cutoff range of 1.0–1.2 nm by using  
753 the force-based switching function. Only atoms in the Verlet pair list with a cutoff range  
754 reassigned every 20 steps were considered. The LINCS algorithm was used to constrain all  
755 bonds involving hydrogen atoms to allow the use of a 2 fs time step (Hess et al. 1997). The

756 suggested protocol for nonbonded interactions with the CHARMM36 force field when used in  
757 the GROMACS suite was followed.

758 The Hbonds plugin in VMD was used to identify hydrogen bond interactions along the  
759 simulations (Humphrey et al. 1996). The geometric criteria adopted are a cutoff of 3.5 Å for  
760 donor-acceptor distance and 30° for acceptor-donor-H angle. The Timeline plugin was used to  
761 count contacts formed by a given amino acid residue. We defined the distance of 4 Å between  
762 any atom pairs as the cutoff for contact.

763

## 764 **5. Data Access**

765 All SARS-CoV-2 sequences used in this study are available from the public repositories Genome  
766 Initiative on Sharing Avian Influenza Data (GISAID, [gisaid.org](https://gisaid.org)), the National Center for  
767 Biotechnology Information (NCBI, <https://www.ncbi.nlm.nih.gov/sars-cov-2/>) and the COVID-19  
768 Genomics UK Consortium (COG, <https://www.sanger.ac.uk/collaboration/covid-19-genomics-uk-cog-uk-consortium/>)

770

## 771 **6. Acknowledgments**

772 The viral evolution research was funded by the Laboratory Directed Research and Development  
773 Program of Oak Ridge National Laboratory, managed by UT-Battelle, LLC for the US  
774 Department of Energy (LOIS:10074) and the structural implication work was funded via the  
775 DOE Office of Science through the National Virtual Biotechnology Laboratory (NVBL), a

776 consortium of DOE national laboratories focused on the response to COVID-19, with funding  
777 provided by the Coronavirus CARES Act. This work was also funded by the United States  
778 Government. This research used resources of the Oak Ridge Leadership Computing Facility  
779 (OLCF) and the Compute and Data Environment for Science (CADES) at the Oak Ridge  
780 National Laboratory, which is supported by the Office of Science of the U.S. Department of  
781 Energy under Contract No. DE-AC05-00OR22725. Figures generated with Biorender and  
782 VMD. We gratefully acknowledge the Originating laboratories responsible for obtaining the  
783 viral specimens and the Submitting laboratories where genetic sequence data were generated and  
784 shared via the GISAID Initiative, on which this research is based.

785

#### 786 *Author Contribution*

787 **MR Garvin:** Conceptualization, Data curation, Funding acquisition, Formal Analysis,  
788 Investigation, Methodology, Visualization, Writing – original draft, Writing – review & editing.

789 **ET Prates:** Formal Analysis, Investigation, Visualization, Writing - original draft, Writing -  
790 review & editing

791 **J Romero:** Conceptualization, Formal Analysis, Investigation, Methodology, Software, Writing  
792 – original draft, Writing – review & editing.

793 **A Cliff:** Methodology, Software, Writing – review & editing

794 **JGFM Gazolla:** Software, Formal Analysis, Investigation, Data Curation, Visualization, Writing  
795 - Review and Editing.



796 **M Pickholz:** Investigation, Visualization, Writing – original draft, Writing – review & editing

797 **M Pavicic:** Investigation, Writing – original draft, Writing – review & editing

798 **DA Jacobson:** Conceptualization, Funding acquisition, Formal Analysis, Investigation, Project

799 administration, Supervision, Resources, Writing – original draft, Writing – review & editing

800

## 801 7. References

- 802 Ali A, Vijayan R. 2020. Dynamics of the ACE2-SARS-CoV-2/SARS-CoV spike protein  
803 interface reveal unique mechanisms. *Sci. Rep.* 10:14214.
- 804 Alpert T, Brito AF, Lasek-Nesselquist E, Rothman J, Valesano AL, MacKay MJ, Petrone ME,  
805 Breban MI, Watkins AE, Vogels CBF, et al. 2021. Early introductions and transmission of  
806 SARS-CoV-2 variant B.1.1.7 in the United States. *Cell* 184:2595–2604.e13.
- 807 Anisimova M, Nielsen R, Yang Z. 2003. Effect of recombination on the accuracy of the  
808 likelihood method for detecting positive selection at amino acid sites. *Genetics* 164:1229–  
809 1236.
- 810 Anon. The GIMP Development Team. (2019). GIMP. Retrieved from <https://www.gimp.org>.  
811 <https://www.gimp.org>.
- 812 Bandelt HJ, Forster P, Röhl A. 1999. Median-joining networks for inferring intraspecific  
813 phylogenies. *Mol. Biol. Evol.* 16:37–48.
- 814 Bentley K, Evans DJ. 2018. Mechanisms and consequences of positive-strand RNA virus  
815 recombination. *J. Gen. Virol.* 99:1345–1356.
- 816 Boni MF, Lemey P, Jiang X, Lam TT-Y, Perry BW, Castoe TA, Rambaut A, Robertson DL.  
817 2020. Evolutionary origins of the SARS-CoV-2 sarbecovirus lineage responsible for the  
818 COVID-19 pandemic. *Nat Microbiol* 5:1408–1417.
- 819 Calistri P, Amato L, Puglia I, Cito F, Di Giuseppe A, Danzetta ML, Morelli D, Di Domenico M,  
820 Caporale M, Scialabba S, et al. 2021. Infection sustained by lineage B.1.1.7 of SARS-CoV-

- 821 2 is characterised by longer persistence and higher viral RNA loads in nasopharyngeal  
822 swabs. *Int. J. Infect. Dis.* 105:753–755.
- 823 Casalino L, Gaieb Z, Goldsmith JA, Hjorth CK, Dommer AC, Harbison AM, Fogarty CA,  
824 Barros EP, Taylor BC, McLellan JS, et al. 2020. Beyond Shielding: The Roles of Glycans  
825 in the SARS-CoV-2 Spike Protein. *ACS Cent Sci* 6:1722–1734.
- 826 Challen R, Brooks-Pollock E, Read JM, Dyson L, Tsaneva-Atanasova K, Danon L. 2021. Risk  
827 of mortality in patients infected with SARS-CoV-2 variant of concern 202012/1: matched  
828 cohort study. *BMJ* 372:n579.
- 829 Chen J, Malone B, Llewellyn E, Grasso M, Shelton PMM, Olinares PDB, Maruthi K, Eng ET,  
830 Vatandaslar H, Chait BT, et al. 2020. Structural Basis for Helicase-Polymerase Coupling in  
831 the SARS-CoV-2 Replication-Transcription Complex. *Cell* 182:1560–1573.e13.
- 832 Darden T, York D, Pedersen L. 1993. Particle mesh Ewald: An  $N \cdot \log(N)$  method for Ewald sums  
833 in large systems. *J. Chem. Phys.* 98:10089–10092.
- 834 Davies NG, Jarvis CI, John Edmunds W, Jewell NP, Diaz-Ordaz K, Keogh RH, CMMID  
835 COVID-19 Working Group. Increased mortality in community-tested cases of SARS-CoV-  
836 2 lineage B.1.1.7. Available from: <http://dx.doi.org/10.1101/2021.02.01.21250959>
- 837 Deng X, Garcia-Knight MA, Khalid MM, Servellita V, Wang C, Morris MK, Sotomayor-  
838 González A, Glasner DR, Reyes KR, Gliwa AS, et al. 2021. Transmission, infectivity, and  
839 neutralization of a spike L452R SARS-CoV-2 variant. *Cell* 184:3426–3437.e8.
- 840 Dutta NK, Mazumdar K, Gordy JT. 2020. The Nucleocapsid Protein of SARS-CoV-2: a Target

- 841 for Vaccine Development. *Journal of Virology* [Internet] 94. Available from:  
842 <http://dx.doi.org/10.1128/jvi.00647-20>
- 843 Evans DJ, Holian BL. 1985. The Nose–Hoover thermostat. *J. Chem. Phys.* 83:4069–4074.
- 844 Faria NR, Mellan TA, Whittaker C, Claro IM, Candido D da S, Mishra S, Crispim MAE, Sales  
845 FCS, Hawryluk I, McCrone JT, et al. 2021. Genomics and epidemiology of the P.1 SARS-  
846 CoV-2 lineage in Manaus, Brazil. *Science* 372:815–821.
- 847 Fratev F. The N501Y and K417N mutations in the spike protein of SARS-CoV-2 alter the  
848 interactions with both hACE2 and human derived antibody: A Free energy of perturbation  
849 study. Available from: <http://dx.doi.org/10.1101/2020.12.23.424283>
- 850 Funk T, Pharris A, Spiteri G, Bundle N, Melidou A, Carr M, Gonzalez G, Garcia-Leon A,  
851 Crispie F, O’Connor L, et al. 2021. Characteristics of SARS-CoV-2 variants of concern  
852 B.1.1.7, B.1.351 or P.1: data from seven EU/EEA countries, weeks 38/2020 to 10/2021.  
853 *Euro Surveill.* [Internet] 26. Available from: [http://dx.doi.org/10.2807/1560-](http://dx.doi.org/10.2807/1560-7917.ES.2021.26.16.2100348)  
854 [7917.ES.2021.26.16.2100348](http://dx.doi.org/10.2807/1560-7917.ES.2021.26.16.2100348)
- 855 Garvin MR, Prates ET, Pavicic M, Jones P, Amos BK, Geiger A, Shah M, Streich J, Gazolla  
856 JGFM, Kainer D, et al. 2020. Potentially adaptive SARS-CoV-2 mutations discovered with  
857 novel spatiotemporal and explainable-AI models. *Genome Biol.* in press.
- 858 Garvin MR, T Prates E, Pavicic M, Jones P, Amos BK, Geiger A, Shah MB, Streich J, Felipe  
859 Machado Gazolla JG, Kainer D, et al. 2020. Potentially adaptive SARS-CoV-2 mutations  
860 discovered with novel spatiotemporal and explainable AI models. *Genome Biol.* 21:304.

- 861 Greaney AJ, Starr TN, Gilchuk P, Zost SJ, Binshtein E, Loes AN, Hilton SK, Huddleston J,  
862 Eguia R, Crawford KHD, et al. Complete mapping of mutations to the SARS-CoV-2 spike  
863 receptor-binding domain that escape antibody recognition. Available from:  
864 <http://dx.doi.org/10.1101/2020.09.10.292078>
- 865 Gribble J, Stevens LJ, Agostini ML, Anderson-Daniels J, Chappell JD, Lu X, Pruijssers AJ,  
866 Routh AL, Denison MR. 2021. The coronavirus proofreading exoribonuclease mediates  
867 extensive viral recombination. *PLoS Pathog.* 17:e1009226.
- 868 Gu H, Chen Q, Yang G, He L, Fan H, Deng Y-Q, Wang Y, Teng Y, Zhao Z, Cui Y, et al. 2020.  
869 Adaptation of SARS-CoV-2 in BALB/c mice for testing vaccine efficacy. *Science*  
870 369:1603–1607.
- 871 Guo G, Gao M, Gao X, Zhu B, Huang J, Luo K, Zhang Y, Sun J, Deng M, Lou Z. 2021. SARS-  
872 CoV-2 non-structural protein 13 (nsp13) hijacks host deubiquitinase USP13 and counteracts  
873 host antiviral immune response. *Signal Transduct Target Ther* 6:119.
- 874 Gupta R, Charron J, Stenger CL, Painter J, Steward H, Cook TW, Faber W, Frisch A, Lind E,  
875 Bauss J, et al. 2020. SARS-CoV-2 (COVID-19) structural and evolutionary dynamicome:  
876 Insights into functional evolution and human genomics. *J. Biol. Chem.* 295:11742–11753.
- 877 Guvench O, Mallajosyula SS, Raman EP, Hatcher E, Vanommeslaeghe K, Foster TJ, Jamison  
878 FW 2nd, Mackerell AD Jr. 2011. CHARMM additive all-atom force field for carbohydrate  
879 derivatives and its utility in polysaccharide and carbohydrate-protein modeling. *J. Chem.*  
880 *Theory Comput.* 7:3162–3180.
- 881 Hess B, Bekker H, Berendsen HJC, Fraaije JGEM. 1997. LINCS: A linear constraint solver for

- 882           molecular simulations. *J. Comput. Chem.* 18:1463–1472.
- 883 Hoffmann M, Kleine-Weber H, Pöhlmann S. 2020. A Multibasic Cleavage Site in the Spike  
884           Protein of SARS-CoV-2 Is Essential for Infection of Human Lung Cells. *Mol. Cell* 78:779–  
885           784.e5.
- 886 Huang J, MacKerell AD Jr. 2013. CHARMM36 all-atom additive protein force field: validation  
887           based on comparison to NMR data. *J. Comput. Chem.* 34:2135–2145.
- 888 Huang P-S, Ban Y-EA, Richter F, Andre I, Vernon R, Schief WR, Baker D. 2011.  
889           RosettaRemodel: a generalized framework for flexible backbone protein design. *PLoS One*  
890           6:e24109.
- 891 Humphrey W, Dalke A, Schulten K. 1996. VMD: visual molecular dynamics. *J. Mol. Graph.*  
892           14:33–38, 27–28.
- 893 Huson DH, Bryant D. 2006. Application of phylogenetic networks in evolutionary studies. *Mol.*  
894           *Biol. Evol.* 23:254–267.
- 895 Jang K-J, Jeong S, Kang DY, Sp N, Yang YM, Kim D-E. 2020. A high ATP concentration  
896           enhances the cooperative translocation of the SARS coronavirus helicase nsP13 in the  
897           unwinding of duplex RNA. *Sci. Rep.* 10:4481.
- 898 Jia Z, Yan L, Ren Z, Wu L, Wang J, Guo J, Zheng L, Ming Z, Zhang L, Lou Z, et al. 2019.  
899           Delicate structural coordination of the Severe Acute Respiratory Syndrome coronavirus  
900           Nsp13 upon ATP hydrolysis. *Nucleic Acids Res.* 47:6538–6550.
- 901 Jorgensen WL, Chandrasekhar J, Madura JD, Impey RW, Klein ML. 1983. Comparison of

- 902 simple potential functions for simulating liquid water. *J. Chem. Phys.* 79:926–935.
- 903 Jo S, Kim T, Iyer VG, Im W. 2008. CHARMM-GUI: a web-based graphical user interface for  
904 CHARMM. *J. Comput. Chem.* 29:1859–1865.
- 905 Jumper J, Tunyasuvunakool K, Kohli P, Hassabis D, AlphaFold Team. Computational  
906 predictions of protein structures associated with COVID-19. *Deep Mind* [Internet].  
907 Available from: [https://deepmind.com/research/open-source/computational-predictions-of-](https://deepmind.com/research/open-source/computational-predictions-of-protein-structures-associated-with-COVID-19)  
908 [protein-structures-associated-with-COVID-19](https://deepmind.com/research/open-source/computational-predictions-of-protein-structures-associated-with-COVID-19)
- 909 Katoh K, Misawa K, Kuma K-I, Miyata T. 2002. MAFFT: a novel method for rapid multiple  
910 sequence alignment based on fast Fourier transform. *Nucleic Acids Res.* 30:3059–3066.
- 911 Kim D, Lee J-Y, Yang J-S, Kim JW, Kim VN, Chang H. 2020. The Architecture of SARS-CoV-  
912 2 Transcriptome. *Cell* 181:914–921.e10.
- 913 Korber B, Fischer WM, Gnanakaran S, Yoon H, Theiler J, Abfalterer W, Hengartner N, Giorgi  
914 EE, Bhattacharya T, Foley B, et al. 2020. Tracking Changes in SARS-CoV-2 Spike:  
915 Evidence that D614G Increases Infectivity of the COVID-19 Virus. *Cell* 182:812–827.e19.
- 916 Lauring AS, Hodcroft EB. 2021. Genetic Variants of SARS-CoV-2-What Do They Mean? *JAMA*  
917 325:529–531.
- 918 Leigh JW, Bryant D. 2015. popart: full-feature software for haplotype network construction.  
919 *Methods Ecol. Evol.* 6:1110–1116.
- 920 Lindahl, Abraham, Hess, Spoel V der. 2020. GROMACS 2020 Source code. Available from:  
921 <https://zenodo.org/record/3562495>

- 922 Liu Y, Liu J, Plante KS, Plante JA, Xie X, Zhang X, Ku Z, An Z, Scharton D, Schindewolf C, et  
923 al. 2021. The N501Y spike substitution enhances SARS-CoV-2 transmission. *bioRxiv*  
924 [Internet]. Available from: <http://dx.doi.org/10.1101/2021.03.08.434499>
- 925 Li Y, Ma M-L, Lei Q, Wang F, Hong W, Lai D-Y, Hou H, Xu Z-W, Zhang B, Chen H, et al.  
926 2021. Linear epitope landscape of the SARS-CoV-2 Spike protein constructed from 1,051  
927 COVID-19 patients. *Cell Rep.* 34:108915.
- 928 Luan B, Wang H, Huynh T. Molecular Mechanism of the N501Y Mutation for Enhanced  
929 Binding between SARS-CoV-2's Spike Protein and Human ACE2 Receptor. Available  
930 from: <http://dx.doi.org/10.1101/2021.01.04.425316>
- 931 Lu J, Li B, Deng A, Li K, Hu Y, Li Z, Xiong Q, Liu Z, Guo Q, Zou L, et al. Viral infection and  
932 transmission in a large, well-traced outbreak caused by the SARS-CoV-2 Delta variant.  
933 Available from: <http://dx.doi.org/10.21203/rs.3.rs-738164/v1>
- 934 Martin DP, Weaver S, Tegally H, San EJ, Shank SD, Wilkinson E, Giandhari J, Naidoo S, Pillay  
935 Y, Singh L, et al. 2021. The emergence and ongoing convergent evolution of the N501Y  
936 lineages coincides with a major global shift in the SARS-CoV-2 selective landscape.  
937 *medRxiv* [Internet]. Available from: <http://dx.doi.org/10.1101/2021.02.23.21252268>
- 938 Muller HJ. 1964. THE RELATION OF RECOMBINATION TO MUTATIONAL ADVANCE.  
939 *Mutat. Res.* 106:2–9.
- 940 Oude Munnink BB, Sikkema RS, Nieuwenhuijse DF, Molenaar RJ, Munger E, Molenkamp R,  
941 van der Spek A, Tolsma P, Rietveld A, Brouwer M, et al. 2021. Transmission of SARS-  
942 CoV-2 on mink farms between humans and mink and back to humans. *Science* 371:172–



943 177.

944 Papa G, Mallery DL, Albecka A, Welch L, Cattin-Ortolá J, Luptak J, Paul D, McMahon HT,  
945 Goodfellow IG, Carter A, et al. Furin cleavage of SARS-CoV-2 Spike promotes but is not  
946 essential for infection and cell-cell fusion. Available from:  
947 <http://dx.doi.org/10.1101/2020.08.13.243303>

948 Parrinello M, Rahman A. 1981. Polymorphic transitions in single crystals: A new molecular  
949 dynamics method. *J. Appl. Phys.* 52:7182–7190.

950 Prates E, Garvin M, Jones P, Miller JI, Kyle S, Cliff A, Gazolla JGFM, Shah M, Walker A, Lane  
951 M, et al. 2021. Antiviral Strategies Against SARS-CoV-2 – For a Bioinformatics Approach.  
952 In: Hann JJ, Bintou A, Keng C, editors. SARS-CoV-2 Methods and Protocols. Springer.

953 Prates ET, Garvin MR, Pavicic M, Jones P, Shah M, Demerdash O, Amos BK, Geiger A,  
954 Jacobson D. 2020. Potential pathogenicity determinants identified from structural  
955 proteomics of SARS-CoV and SARS-CoV-2. *Mol. Biol. Evol.* [Internet]. Available from:  
956 <http://dx.doi.org/10.1093/molbev/msaa231>

957 Rand AC, Jain M, Eizenga JM, Musselman-Brown A, Olsen HE, Akeson M, Paten B. 2017.  
958 Mapping DNA methylation with high-throughput nanopore sequencing. *Nat. Methods*  
959 14:411–413.

960 Richard M, Kok A, de Meulder D, Bestebroer TM, Lamers MM, Okba NMA, Fentener van  
961 Vlissingen M, Rockx B, Haagmans BL, Koopmans MPG, et al. 2020. SARS-CoV-2 is  
962 transmitted via contact and via the air between ferrets. *Nat. Commun.* 11:3496.

- 963 Rodrigues CHM, Pires DEV, Ascher DB. 2021. DynaMut2: Assessing changes in stability and  
964 flexibility upon single and multiple point missense mutations. *Protein Sci.* 30:60–69.
- 965 Ronquist F, Huelsenbeck JP. 2003. MrBayes 3: Bayesian phylogenetic inference under mixed  
966 models. *Bioinformatics* 19:1572–1574.
- 967 Sabino EC, Buss LF, Carvalho MPS, Prete CA Jr, Crispim MAE, Fraiji NA, Pereira RHM, Parag  
968 KV, da Silva Peixoto P, Kraemer MUG, et al. 2021. Resurgence of COVID-19 in Manaus,  
969 Brazil, despite high seroprevalence. *Lancet* [Internet]. Available from:  
970 [http://dx.doi.org/10.1016/S0140-6736\(21\)00183-5](http://dx.doi.org/10.1016/S0140-6736(21)00183-5)
- 971 Santerre M, Arjona SP, Allen CN, Shcherbik N, Sawaya BE. 2020. Why do SARS-CoV-2 NSPs  
972 rush to the ER? *J. Neurol.* [Internet]. Available from: [http://dx.doi.org/10.1007/s00415-020-](http://dx.doi.org/10.1007/s00415-020-10197-8)  
973 [10197-8](http://dx.doi.org/10.1007/s00415-020-10197-8)
- 974 Sawatzki K, Hill NJ, Puryear WB, Foss AD, Stone JJ, Runstadler JA. 2021. Host barriers to  
975 SARS-CoV-2 demonstrated by ferrets in a high-exposure domestic setting. *Proc. Natl.*  
976 *Acad. Sci. U. S. A.* [Internet] 118. Available from:  
977 <http://dx.doi.org/10.1073/pnas.2025601118>
- 978 Shang J, Ye G, Shi K, Wan Y, Luo C, Aihara H, Geng Q, Auerbach A, Li F. 2020. Structural  
979 basis of receptor recognition by SARS-CoV-2. *Nature* 581:221–224.
- 980 Shannon P, Markiel A, Ozier O, Baliga NS, Wang JT, Ramage D, Amin N, Schwikowski B,  
981 Ideker T. 2003. Cytoscape: a software environment for integrated models of biomolecular  
982 interaction networks. *Genome Res.* 13:2498–2504.

- 983 Sheikh A, McMenamin J, Taylor B, Robertson C. 2021. SARS-CoV-2 Delta VOC in Scotland:  
984 demographics, risk of hospital admission, and vaccine effectiveness. *The Lancet* [Internet].  
985 Available from: [http://dx.doi.org/10.1016/s0140-6736\(21\)01358-1](http://dx.doi.org/10.1016/s0140-6736(21)01358-1)
- 986 Simon-Loriere E, Holmes EC. 2011. Why do RNA viruses recombine? *Nat. Rev. Microbiol.*  
987 9:617–626.
- 988 Simpson JT, Workman RE, Zuzarte PC, David M, Dursi LJ, Timp W. 2017. Detecting DNA  
989 cytosine methylation using nanopore sequencing. *Nat. Methods* 14:407–410.
- 990 Singh A, Steinkellner G, Köchl K, Gruber K, Gruber CC. Serine 477 plays a crucial role in the  
991 interaction of the SARS-CoV-2 spike protein with the human receptor ACE2. Available  
992 from: <http://dx.doi.org/10.21203/rs.3.rs-106969/v1>
- 993 Singh J, Rahman SA, Ehtesham NZ, Hira S, Hasnain SE. 2021. SARS-CoV-2 variants of  
994 concern are emerging in India. *Nat. Med.* [Internet]. Available from:  
995 <http://dx.doi.org/10.1038/s41591-021-01397-4>
- 996 Starr TN, Greaney AJ, Addetia A, Hannon WW, Choudhary MC, Dingens AS, Li JZ, Bloom JD.  
997 2021. Prospective mapping of viral mutations that escape antibodies used to treat COVID-  
998 19. *Science* [Internet]. Available from: <http://dx.doi.org/10.1126/science.abf9302>
- 999 Starr TN, Greaney AJ, Hilton SK, Crawford KHD, Navarro MJ, Bowen JE, Alejandra Tortorici  
1000 M, Walls AC, Veessler D, Bloom JD. Deep mutational scanning of SARS-CoV-2 receptor  
1001 binding domain reveals constraints on folding and ACE2 binding. Available from:  
1002 <http://dx.doi.org/10.1101/2020.06.17.157982>

- 1003 Thorne LG, Bouhaddou M, Reuschl A-K, Zuliani-Alvarez L, Polacco B, Pelin A, Batra J,  
1004 Whelan MVX, Ummadi M, Rojc A, et al. 2021. Evolution of enhanced innate immune  
1005 evasion by the SARS-CoV-2 B.1.1.7 UK variant. *bioRxiv* [Internet]. Available from:  
1006 <http://dx.doi.org/10.1101/2021.06.06.446826>
- 1007 Tylor S, Andonov A, Cutts T, Cao J, Grudsky E, Van Domselaar G, Li X, He R. 2009. The SR-  
1008 rich motif in SARS-CoV nucleocapsid protein is important for virus replication. *Canadian*  
1009 *Journal of Microbiology* [Internet] 55:254–260. Available from:  
1010 <http://dx.doi.org/10.1139/w08-139>
- 1011 Velasco JD. 2013. Phylogeny as population history. *Philosophy and Theory in Biology* [Internet]  
1012 5. Available from: <http://dx.doi.org/10.3998/ptb.6959004.0005.002>
- 1013 Verba K, Gupta M, Azumaya C, Moritz M, Pourmal S, Diallo A, Merz G, Jang G, Bouhaddou  
1014 M, Fossati A, et al. 2021. CryoEM and AI reveal a structure of SARS-CoV-2 Nsp2, a  
1015 multifunctional protein involved in key host processes. *Res Sq* [Internet]. Available from:  
1016 <http://dx.doi.org/10.21203/rs.3.rs-515215/v1>
- 1017 Volz E, Mishra S, Chand M, Barrett JC, Johnson R, Geidelberg L, Hinsley WR, Laydon DJ,  
1018 Dabrera G, O’Toole Á, et al. Transmission of SARS-CoV-2 Lineage B.1.1.7 in England:  
1019 Insights from linking epidemiological and genetic data. Available from:  
1020 <http://dx.doi.org/10.1101/2020.12.30.20249034>
- 1021 Wang Z, Schmidt F, Weisblum Y, Muecksch F, Barnes CO, Finkin S, Schaefer-Babajew D,  
1022 Cipolla M, Gaebler C, Lieberman JA, et al. 2021. mRNA vaccine-elicited antibodies to  
1023 SARS-CoV-2 and circulating variants. *Nature* [Internet]. Available from:

- 1024 <http://dx.doi.org/10.1038/s41586-021-03324-6>
- 1025 Washington NL, Gangavarapu K, Zeller M, Bolze A, Cirulli ET, Schiabor Barrett KM, Larsen  
1026 BB, Anderson C, White S, Cassens T, et al. 2021. Emergence and rapid transmission of  
1027 SARS-CoV-2 B.1.1.7 in the United States. *Cell* 184:2587–2594.e7.
- 1028 Wrapp D, Wang N, Corbett KS, Goldsmith JA, Hsieh C-L, Abiona O, Graham BS, McLellan JS.  
1029 2020. Cryo-EM structure of the 2019-nCoV spike in the prefusion conformation. *Science*  
1030 367:1260–1263.
- 1031 Xia H, Cao Z, Xie X, Zhang X, Chen JY-C, Wang H, Menachery VD, Rajsbaum R, Shi P-Y.  
1032 2020. Evasion of Type I Interferon by SARS-CoV-2. *Cell Rep.* 33:108234.
- 1033 Yan L, Zhang Y, Ge J, Zheng L, Gao Y, Wang T, Jia Z, Wang H, Huang Y, Li M, et al. 2020.  
1034 Architecture of a SARS-CoV-2 mini replication and transcription complex. *Nat. Commun.*  
1035 11:5874.
- 1036 Yan R, Zhang Y, Li Y, Xia L, Guo Y, Zhou Q. 2020. Structural basis for the recognition of  
1037 SARS-CoV-2 by full-length human ACE2. *Science* 367:1444–1448.
- 1038 Zhang B-Z, Hu Y-F, Chen L-L, Yau T, Tong Y-G, Hu J-C, Cai J-P, Chan K-H, Dou Y, Deng J,  
1039 et al. 2020. Mining of epitopes on spike protein of SARS-CoV-2 from COVID-19 patients.  
1040 *Cell Res.* 30:702–704.
- 1041 Zhang L, Jackson CB, Mou H, Ojha A, Peng H, Quinlan BD, Rangarajan ES, Pan A,  
1042 Vanderheiden A, Suthar MS, et al. 2020. SARS-CoV-2 spike-protein D614G mutation  
1043 increases virion spike density and infectivity. *Nat. Commun.* 11:6013.
- 1044

1045 **Supplementary Material**

1046

1047 **The emergence of highly fit SARS-CoV-2 variants accelerated by recombination**

1048 Michael R. Garvin<sup>1,2+\*</sup>, Erica T. Prates<sup>1,2+</sup>, Jonathon Romero<sup>3</sup>, Ashley Cliff<sup>3</sup>, Joao Gabriel Felipe

1049 Machado Gazolla<sup>1,2</sup>, Monica Pickholz<sup>4,5</sup>, Mirko Pavicic<sup>1,2</sup>, Daniel Jacobson<sup>1,2,\*</sup>

1050

1051 **Affiliations:**

1052 <sup>1</sup>Oak Ridge National Laboratory, Computational Systems Biology, Biosciences, Oak Ridge, TN; <sup>2</sup>National Virtual

1053 Biotechnology Laboratory, US Department of Energy; <sup>3</sup>The Bredesen Center for Interdisciplinary Research and

1054 Graduate Education, University of Tennessee Knoxville, Knoxville, TN; <sup>4</sup>Departamento de Física, Facultad de

1055 Ciencias Exactas y Naturales, Universidad de Buenos Aires, Buenos Aires, Argentina; <sup>5</sup> Instituto de Física de

1056 Buenos Aires (IFIBA), CONICET-Universidad de Buenos Aires, Buenos Aires, Argentina.

1057

1058 \*Correspondence: [garvinmr@ornl.gov](mailto:garvinmr@ornl.gov), [jacobsonda@ornl.gov](mailto:jacobsonda@ornl.gov)

1059 <sup>+</sup>**Contributed equally**

1060

1061 **1. Supplementary Figures**

1062

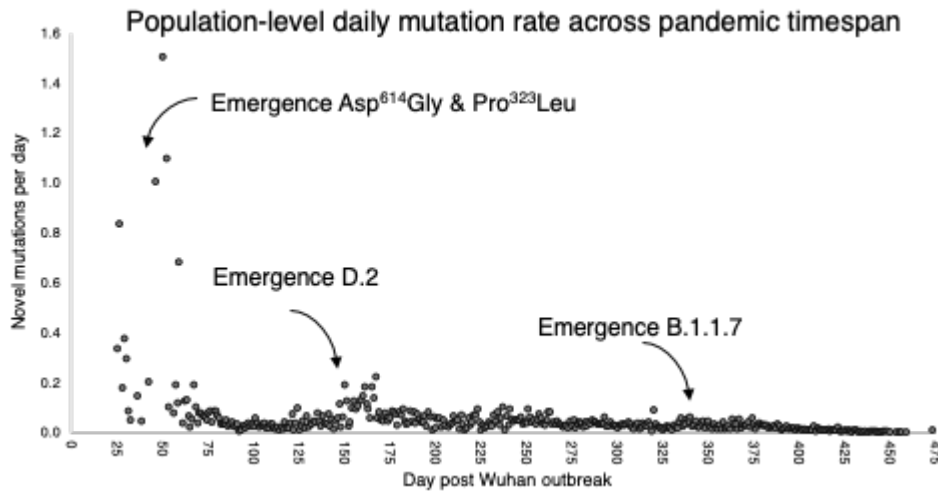

1063

1064 **Fig. S1.**

1065 **Population level mutation rate over the course of the pandemic.** Number of novel mutations sampled across the  
1066 globe for each day are plotted against time (days from the Wuhan outbreak). Emergence of major VOC are  
1067 provided for context and show small increases in the number of new mutations but there is an overall decrease  
1068 across time, even accounting for multiple mutations at a site to different nucleotide states and deletions.

1069

1070

1071

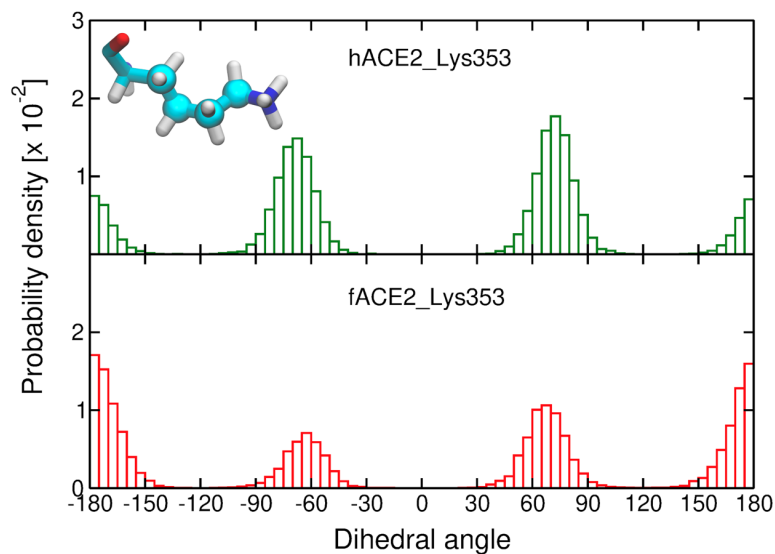

1072

1073 **Fig. S2.**

1074 **The probability density of the conformations of Lys<sup>353</sup> in human and ferret ACE2 in the simulations.**

1075 Histograms of the distribution of a dihedral angle of the Lys<sup>353</sup> side chain carbon atoms in human ACE2 (hACE2,  
1076 upper figure) and ferret ACE2 (fACE2, lower figure) in complex with the SARS-CoV-2 S receptor-binding domain.

1077 The atoms forming the selected dihedral are depicted as spheres in the molecular representation of Lys<sup>353</sup>. Three  
1078 independent simulations are considered for the calculation of the histograms. Dihedral angles near ±180° correspond  
1079 to a more stretched conformation (i.e., *trans*).

1080



1081

1082

1083

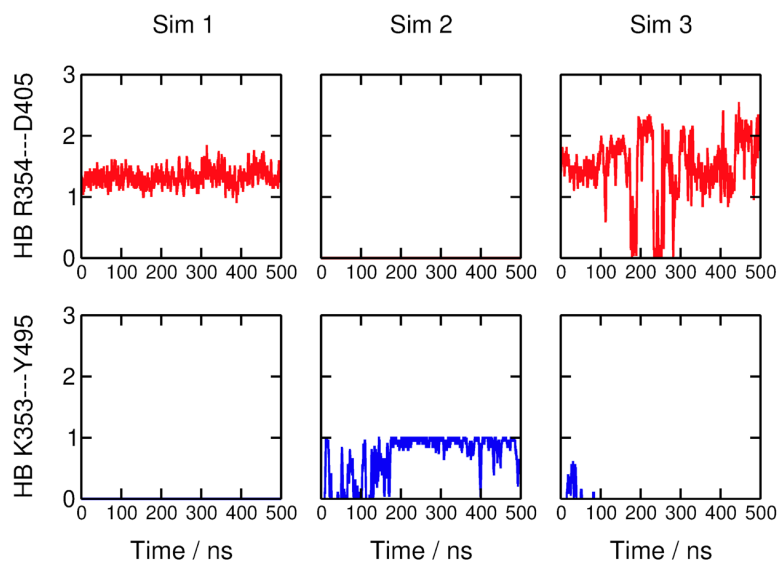

1084

1085 **Fig. S3.**

1086 **Competing hydrogen bond interactions formed between positively charged amino acid residues in ferret**

1087 **ACE2 (fACE2) and the SARS-CoV-2 S receptor-binding domain.** Time evolution of the number of hydrogen

1088 bonds (HB) that fACE2 Arg3<sup>54</sup> and Lys3<sup>53</sup> form with Asp<sup>405</sup> and Tyr<sup>495</sup> from the SARS-CoV-2 S receptor-binding

1089 domain. The columns correspond to the three simulation replicas. The geometric criteria adopted for hydrogen

1090 bonds are a cutoff of 3.0 Å for donor-acceptor distance and 20° for acceptor-donor-H angle.

1091

1092

1093 **2. Supplementary Tables**

1094

1095 **Table S4.**

1096 **Average number of contacts formed between Asn<sup>501</sup> in the receptor-binding domains of SARS-CoV-2 S and**  
1097 **residues in ACE2 from human (hACE2) and ferret (fACE2).** A distance of 4 Å between any atom pairs was  
1098 defined as the cut-off for contact statistics.

1099

| ACE2 residue       | hACE2       | fACE2       |
|--------------------|-------------|-------------|
| Tyr <sup>41</sup>  | 0.96 ± 0.02 | 0.80 ± 0.03 |
| Lys <sup>353</sup> | 0.99 ± 0.01 | 0.90 ± 0.01 |
| Asp <sup>353</sup> | 0.98 ± 0.01 | 0.70 ± 0.04 |

1100

1101

1102
